# Supplementary material for: The proximal experience of gratitude
Source: PubMed Central journal article supplement (PMC5501400; doi:10.1371/journal.pone.0179123), 2017-07-07
Supplement: pone.0179123.s001.pdf [file pone.0179123.s001.pdf]

## **Supporting information (S1 File)**

### The Proximal Experience of Gratitude

Kristin Layous<sup>1</sup>

Kate Sweeny<sup>2</sup>

Christina Armenta<sup>2</sup>

Soojung Na<sup>3</sup>

Incheol Choi<sup>3</sup>

Sonja Lyubomirsky<sup>2</sup>

<sup>1</sup>California State University, East Bay

<sup>2</sup>University of California, Riverside

<sup>3</sup>Seoul National University

### Author Note

Correspondence should be addressed to Kristin Layous at the Department of Psychology, California State University, East Bay, 25800 Carlos Bee Blvd, Hayward, CA 94542-3091. E-mail: kristin.layous@csueastbay.edu.

## Study 1

### Recruitment Text

The purpose of this study is to learn about everyday experiences. You will recall recent life experiences and then complete several questionnaires about those experiences. The survey should take about 15 minutes to complete.

### Experimental Instructions:

#### Near-Miss Relief

Think of a time during the last month when you narrowly avoided a bad outcome and felt RELIEF as a result. For example...

- Maybe you thought something was lost, and then you found it
- Maybe you almost had a car accident or almost injured yourself, but avoided it at the last minute
- Maybe you almost did something embarrassing or damaging in some way, but avoided it at the last minute
- Maybe you thought something bad had happened, but then found out it hadn't happened

Take a few moments to recall your experience of RELIEF in as much detail as you can. Now, write about the experience, including what almost went wrong, how it was avoided, and how you felt throughout the experience.

Please do not provide identifying information such as your name, place of work etc. If these details are important to the story, just put "XXXX" in place of the identifying detail.

#### Task-Completion Relief

Think of a time during the last month when you finished an unpleasant task and felt RELIEF as a result. For example...

- Maybe you finished a dreaded exam or project
- Maybe you got through a long or difficult day at work or school
- Maybe you got through a presentation, conversation, or confrontation that you were worried about

Take a few moments to recall your experience of RELIEF in as much detail as you can. Now, write about the experience, including what almost went wrong, how it was avoided, and how you felt throughout the experience.

Please do not provide identifying information such as your name, place of work etc. If these details are important to the story, just put "XXXX" in place of the identifying detail.

## **Gratitude**

Think of a time during the last month when someone did something for you for which you were truly GRATEFUL. For example...

- Maybe they took care of you when you were sick
- Maybe they helped you prepare for a stressful exam
- Maybe they did something to brighten your day out of the blue

Take a few moments to recall your experience of GRATITUDE in as much detail as you can. Now, write about the experience, including who that person is, what they did for you, and how you felt throughout the experience.

Please do not provide identifying information such as your name, place of work etc. If these details are important to the story, just put "XXXX" in place of the identifying detail.

## **Outcome Measures:**

The following scale consists of a number of words that describe different feelings and emotions. Read each item and then select the response that best indicates how you are feeling RIGHT NOW.

Right now, I feel... (7-point scale; anchors: Not at all, Very Slightly, Somewhat, Moderately, Much, Very Much, Extremely)

- Moved
- Uplifted
- Guilty
- Optimistic about humanity
- A warm feeling in your chest
- Humbled
- Indebted (feeling like you need to repay another for their actions that benefitted you)
- A desire to help others
- A desire to become a better person
- Grateful
- Happy
- Worried/anxious
- Pleased
- Relieved
- Angry
- Frustrated
- Depressed/blue
- Unhappy
- Inspired
- Scared
- Upset
- Nervous

For this set of questions, please focus on the FEELING of relief/gratitude (depending on condition) you had during the experience you wrote about (5-point scale; anchors: Strongly disagree, Disagree, Neither agree nor disagree, Agree, Strongly agree)

- The feeling of relief/gratitude was mild
- The feeling of relief/gratitude was intense
- The feeling of relief/gratitude came on suddenly
- The feeling of relief/gratitude developed gradually
- The feeling of relief/gratitude was only positive
- The feeling of relief/gratitude was only negative
- The feeling of relief/gratitude was a mix of positive and negative
- The feeling of relief/gratitude made me feel more connected to other people
- The feeling of relief/gratitude made me feel isolated from other people.
- The feeling of relief/gratitude made me feel like doing something for someone else.
- The feeling of relief/gratitude made me want to be a better person.
- I felt energetic when the relief/gratitude hit me.
- I felt calm when the relief/gratitude hit me.

The following questions ask about your thoughts you might have had during your experience. Continue to focus on the period of time WHILE you were experiencing this feeling (7-point scale; anchors: 1 = Not at all, 4 = Somewhat, 7 = Very Much).

- To what extent were you thinking about how things could have turned out differently?
- To what extent were you thinking about how things could have turned out BETTER?
- To what extent were you thinking about how things could have been WORSE?

## **Demographics**

### **Study 2**

#### **Recruitment Text**

The purpose of this study is to learn about every day experiences. You will recall recent life experiences and then complete several questionnaires about those experiences. The survey should take about 15 minutes to complete.

#### **Experimental Instructions:**

##### **Gratitude Letter**

Please take a moment to think back over the past several years of your life and remember an instance when someone did something for you for which you are extremely grateful. For example, think of the people – parents, relatives, friends, teachers, coaches, teammates, employers, and so on – who have been especially kind to you but have never heard you express your gratitude.

Now, for the next 10 minutes, write a letter to one of these individuals. Use the instructions below to help guide you through this process:

1. Use whatever letter format you like, but remember to write as though you are directly addressing the individual you are grateful to. If it is helpful to head the letter “Dear so-and-so,” or end with “Sincerely, XXX,” feel free to do so.
2. Do not worry about perfect grammar and spelling.
3. Describe in specific terms why you are grateful to this individual and how the individual’s behavior affected your life.
4. Describe what you are doing now and how you often remember their efforts.
5. Remember: Anything you write will remain strictly confidential. Although you are welcome to show or give this letter to anyone you please, for the purposes of this study, the letter you write is a private document in which you can express your gratitude freely without intent to deliver it to anyone. Should an experimenter read this entry in the future, it will be identifiable only by a subject number and not by a name.

**\*All of the same measures were used as in Study 1**

## Study 3

### Recruitment Text

This is a study about life experiences. In this study, you will be asked to write about your life experiences and then complete online questionnaires about your thoughts and emotions.

If you would like to sign up for this study, please visit the following website to create a unique username and password: [www.modernresearch.org](http://www.modernresearch.org). You will be asked for your name and email address, but this information will be kept separate from your responses to the study. If you have any questions regarding the study, feel free to email [pplab.ucr@gmail.com](mailto:pplab.ucr@gmail.com).

### Experimental Manipulations:

#### Gratitude

Please take a moment to think back over the past several years of your life and remember an instance when someone did a kind act (or acts) for you for which you are extremely grateful. For example, think of the people – parents, children, spouses/partners, relatives, friends, neighbors, teachers, employers, and so on – who have been especially generous and thoughtful towards you. Now for the next 5 minutes, write about how that person helped you. Use the instructions below to help guide you through this process:

1. Do not worry about perfect grammar and spelling.
2. Describe in specific terms the kind act this person bestowed upon you and how the kind act affected your life.
3. Describe what you are doing now and how you often remember their efforts.
4. Remember: Anything you write will remain strictly confidential. Should an experimenter read this entry in the future, it will be identifiable only by a subject number and not by a name.

#### Kindness

Please take a moment to think back over the past several years of your life and remember an instance when you did a kind act (or acts) for someone. For example, think of the family members, friends, fellow students, or fellow community members with whom you have interacted and to whom you've been especially generous or thoughtful. Now for the next 5 minutes, write about who you helped and why. Use the instructions below to help guide you through this process:

1. Do not worry about perfect grammar and spelling.
2. Describe in specific terms the kind act or acts you performed and how it affected the person's life.
3. Describe what they are doing now and how often you think about them.

4. Remember: Anything you write will remain strictly confidential. Should an experimenter read this entry in the future, it will be identifiable only by a subject number and not by a name.

### **Control**

Please take a moment to think about what you did during the last 7 days. That is, create a mental outline of what you did during that time. Now, for the next 5 minutes, please write out these activities in a list format. Be as detail-oriented as possible, but try to leave out emotions, feelings, or opinions pertaining to your plans. In other words, focus on exactly what you did.

Finally, as you write, don't worry about perfect grammar and spelling, and remember that anything you write will remain strictly confidential. Should an experimenter read this entry in the future, it will be identifiable only by a participant number and not by a name.

### **Post-Manipulation Measures**

*For the purposes of other research questions about measurement issues in positive affect, we included two affect scales (along with our other measures), both of which the current study draws from to explore as similar emotions as possible to the other studies.*

**Elevation Scale** (based on the work by John Haidt (2003a, 2003b); measure from Schnall, Roper, and Fessler, 2012)

\*We added guilty, indebted, and grateful to explore our other hypotheses

While engaging in the writing task, to what degree did you feel each of the following emotions? (1 = *didn't feel at all*, 4 = *felt moderately*, 7 = *felt very strongly*)

1. Moved
2. Uplifted
3. Guilty
4. Optimistic about humanity
5. A warm feeling in your chest
6. Indebted (feeling like you need to repay another for their actions that benefitted you)
7. A desire to help others
8. A desire to become a better person
9. Grateful
10. Happy

**Affect-Adjective Scale** (Diener & Emmons, 1985)

\*Note: For separate research questions about measurement issues in positive and emotions, we included two measures of positive emotions, the Affect-Adjective Scale (Diener & Emmons, 1985) and the Modified Differential Emotions Scale (mDES; Fredrickson, Tugade, Waugh, & Larkin, 2003; see all measures in Supplemental Materials). Most of the emotions from the first three studies are reflected in the elevation and Affect-Adjective scales, but we drew *embarrassed* and *ashamed* from the mDES, which were actually listed as “embarrassed, self-conscious, blushing” and “ashamed, humiliated, and disgraced,” respectively. We converted those items from a 5-point scale to a 7-point scale to match the other emotions.

Using the 7-point scale below, please indicate the extent to which you feel this way RIGHT NOW (*Not at all, Very slightly, Somewhat, Moderately, Much, Very Much*).

Worried/Anxious  
Pleased  
Angry  
Frustrated  
Depressed/Blue  
Joyful  
Unhappy  
Enjoyment/Fun

**GQ-6** (adapted to reflect state gratitude; McCullough, Emmons, & Tsang, 2002)

Please indicate the extent to which you agree with each statement below (1 = *strongly disagree*, 2 = *disagree*, 3 = *slightly disagree*, 4 = *neutral*, 5 = *slightly agree*, 6 = *agree*, 7 = *strongly agree*).

1. Right now I feel that I have much in life to be thankful for.
2. If I had to list everything that I was grateful for right now, it would be a very long list.
3. When I look at the world, I don't see much to be grateful for right now (reverse-scored).
4. I am grateful to a wide variety of people currently in my life.
5. Right now, I find myself more able to appreciate the people, events, and situations that have been part of my life history.
6. Right now, I find it difficult to feel grateful to something or someone (reverse-scored)

**Just Connectedness Scale of Balanced Measure for Psychological Needs** (state version; Sheldon & Hilpert, 2012)

Please read each of the following statements carefully. Select the point on the scale that represents how true each statement is for you RIGHT NOW (1 = *no agreement*, 3 = *some agreement*, 5 = *much agreement*)

1. I feel a sense of contact with people who care for me, and whom I care for.
2. I feel lonely (reverse-scored)
3. I feel close and connected with other people who are important to me.
4. I feel unappreciated by one or more important people (reverse-scored)
5. I feel a strong sense of intimacy with the people I spend time with.
6. I am having disagreement or conflicts with people I usually get along with (reverse-scored)

**Modified Differential Emotions Scale** (mDES; Frederickson, Cohn, Coffey, Pek, & Finkel, 2008)

For each of the following items, please click the item that best describes the greatest amount of each emotion you feel RIGHT NOW (*Never, Hardly, Some of the time, Often, All the time*).

1. I have felt amused, fun-loving, silly
2. I have felt angry, irritated, annoyed
3. I have felt ashamed, humiliated, disgraced
4. I have felt awe, wonder, amazement
5. I have felt contemptuous, scornful, disdainful



6. I have felt content, serene, peaceful
7. I have felt disgust, distaste, revulsion
8. I have felt embarrassed, self-conscious, blushing
9. I have felt glad, happy, joyful
10. I have felt grateful, appreciative, thankful
11. I have felt hopeful, optimistic, encouraged
12. I have felt interested, alert, curious
13. I have felt love, closeness, trust
14. I have felt proud, confident, self-assured
15. I have felt repentant, guilty, blameworthy
16. I have felt sad, downhearted, unhappy
17. I have felt scared, fearful, afraid
18. I have felt attracted to someone, flirtatious
19. I have felt surprised, amazed, astonished
20. I have felt sympathy, concern, compassion

**State-Trait Anxiety Inventory** (STAI; shortened version; validated in van der Bij, de Weerd, Cikot, Steegers, & Braspenning, 2003).

A number of statements which people have used to describe themselves are given below. Read each statement and use the following scale to indicate how you feel right now, at this very moment. There are no right or wrong answers. Do not spend too much time on any one statement, but give the answer which seems to best describe your present feelings (*Not at all, Somewhat, Moderately, Very much*)

1. I feel calm.
2. I am tense.
3. I feel upset.
4. I am relaxed.
5. I feel content.
6. I am worried.

**Subjective Happiness Scale** (Lyubomirsky & Lepper, 1999)

**Satisfaction With Life Scale** (Diener, Emmons, Larsen, & Griffin, 1985)

**Balanced Measure of Psychological Needs** (Sheldon & Hilpert, 2012)

The State-Trait Anxiety Inventory, Subjective Happiness Scale, and Satisfaction With Life Scale, and the Balanced Measure of Psychological Needs did not show any differences across conditions, all  $F_s < 1.19$ .

## **Demographics**

Table A

*Contrast Analyses on Elevation Composite*

| Study             | <i>df</i> | <i>t</i> <sub>contrast</sub> | <i>p</i> | <i>r</i> 95% CI[] |
|-------------------|-----------|------------------------------|----------|-------------------|
| Study 1           |           |                              |          |                   |
| <i>Contrast 1</i> | 134       | 2.06                         | .04      | .18 [.01, .33]    |
| <i>Contrast 2</i> | 102       | 2.19                         | .03      | .21 [.02, .39]    |
| <i>Contrast 3</i> | 82        | 1.29                         | .20      | .14 [-.07, .34]   |
| Study 2           |           |                              |          |                   |
| <i>Contrast 1</i> | 127       | 2.31                         | .02      | .20 [.03, .36]    |
| <i>Contrast 2</i> | 93        | 1.92                         | .06      | .20 [-.01, .38]   |
| <i>Contrast 3</i> | 77        | 2.06                         | .04      | .23 [.01, .43]    |
| Study 3           |           |                              |          |                   |
| <i>Contrast 1</i> | 427       | 3.93                         | <.001    | .19 [.09, .28]    |
| <i>Contrast 2</i> | 291       | 15.76                        | <.001    | .68 [.61, .74]    |
| <i>Contrast 3</i> | 280       | 11.55                        | <.001    | .57 [.48, .64]    |

*Note:* The elevation composite included five items: Moved, uplifted, optimistic about humanity, a warm feeling in your chest, a desire to help others, and a desire to become a better person (Schnall, Roper, & Fessler, 2012; (7-point scale indicating the degree to which they felt each of the above items right now; anchors: Not at all, Very Slightly, Somewhat, Moderately, Much, Very Much, Extremely). To focus the main manuscript on emotions, we only presented “moved” and “uplifted” to represent this elevation composite. We include the results on the full composite here for interested readers.

## Contrast Weights:

Study 1: *Contrast 1:* Gratitude Experience (+1), Gratitude Letter (+1), Near-Miss Relief (-2); *Contrast 2:* Gratitude Experience (+1), Gratitude Letter (0), Near-Miss Relief (-1); *Contrast 3:* Gratitude Experience (0), Gratitude Letter (+1), Near-Miss Relief (-1).

Study 2: *Contrast 1:* Gratitude Experience (+2), Near-Miss Relief (-1), Task-Completion Relief (-1); *Contrast 2:* Gratitude Experience (+1), Near-Miss Relief (-1), Task-Completion (0); *Contrast 3:* Gratitude Experience (+1), Near-Miss Relief (0), Task-Completion Relief (-1).

Study 3: *Contrast 1:* Gratitude (+1), Kindness (-1), Control (0); *Contrast 2:* Gratitude (+1), Kindness (0), Control (-1); *Contrast 3:* Gratitude (0), Kindness (+1), Control (-1).

Table B

*Bivariate Correlations Among Variables in Study 1*

| Variable               | 1    | 2    | 3    | 4     | 5    | 6    | 7    | 8    | 9    | 10   | 11   | 12   | 13   | 14   | 15   | 16   | 17   | 18   | 19 |  |
|------------------------|------|------|------|-------|------|------|------|------|------|------|------|------|------|------|------|------|------|------|----|--|
| 1. Grateful            | --   |      |      |       |      |      |      |      |      |      |      |      |      |      |      |      |      |      |    |  |
| 2. Relieved            | .52  | --   |      |       |      |      |      |      |      |      |      |      |      |      |      |      |      |      |    |  |
| 3. Indebted            | .42  | .32  | --   |       |      |      |      |      |      |      |      |      |      |      |      |      |      |      |    |  |
| 4. Guilty              | -.01 | .10  | .20  | --    |      |      |      |      |      |      |      |      |      |      |      |      |      |      |    |  |
| 5. Moved               | .39  | .36  | .46  | .23   | --   |      |      |      |      |      |      |      |      |      |      |      |      |      |    |  |
| 6. Uplifted            | .46  | .36  | .47  | .17   | .68  | --   |      |      |      |      |      |      |      |      |      |      |      |      |    |  |
| 7. Connected to others | .34  | .26  | .26  | -.09  | .38  | .37  | --   |      |      |      |      |      |      |      |      |      |      |      |    |  |
| 8. Happy               | .64  | .48  | .35  | -.06  | .28  | .38  | .27  | --   |      |      |      |      |      |      |      |      |      |      |    |  |
| 9. Worried/anxious     | -.26 | -.11 | -.03 | .37   | -.08 | -.15 | -.25 | -.37 | --   |      |      |      |      |      |      |      |      |      |    |  |
| 10. Angry              | -.31 | -.03 | -.03 | .51   | .05  | -.06 | -.14 | -.34 | .61  | --   |      |      |      |      |      |      |      |      |    |  |
| 11. Frustrated         | -.30 | -.02 | -.14 | .44   | .01  | -.12 | -.17 | -.39 | .66  | .83  | --   |      |      |      |      |      |      |      |    |  |
| 12. Depressed/blue     | -.33 | -.12 | -.09 | .36   | -.10 | -.12 | -.21 | -.44 | .63  | .66  | .77  | --   |      |      |      |      |      |      |    |  |
| 13. Joyful             | .61  | .52  | .23  | -.10  | .32  | .37  | .38  | .68  | -.33 | -.25 | -.27 | -.29 | --   |      |      |      |      |      |    |  |
| 14. Nervous            | -.17 | .05  | .05  | .45   | .12  | -.01 | -.09 | -.21 | .63  | .56  | .63  | .59  | -.27 | --   |      |      |      |      |    |  |
| 15. Inspired           | .56  | .42  | .36  | -.001 | .47  | .49  | .28  | .52  | -.12 | -.15 | -.18 | -.17 | .58  | -.03 | --   |      |      |      |    |  |
| 16. Scared             | -.01 | .09  | .02  | .46   | .22  | .01  | .05  | -.10 | .52  | .54  | .58  | .42  | -.07 | .60  | .06  | --   |      |      |    |  |
| 17. Upset              | -.33 | -.08 | -.08 | .43   | .05  | -.14 | -.18 | -.41 | .75  | .75  | .77  | .76  | -.34 | .77  | -.16 | .62  | --   |      |    |  |
| 18. Unhappy            | -.21 | -.05 | -.02 | .36   | .02  | -.05 | -.11 | -.31 | .62  | .67  | .73  | .70  | -.35 | .59  | -.12 | .52  | .73  | --   |    |  |
| 19. Pleased            | .55  | .55  | .32  | -.09  | .41  | .39  | .33  | .50  | -.28 | -.21 | -.26 | -.30 | .57  | -.20 | .43  | -.04 | -.29 | -.24 | -- |  |

*Note:* Correlations are all based on at least 133 participants. Correlations .17 and above are significant at  $p \leq .05$ . Correlations .22 and above are significant at  $p \leq .01$ . Correlations .28 and above are significant at  $p \leq .001$ .

Table C

*Cluster Centroids for Study 1*

| All Participants |                                 |                               |                               |
|------------------|---------------------------------|-------------------------------|-------------------------------|
| Item             | <i>M (SD)</i> across conditions | Cluster 1<br>( <i>n</i> = 85) | Cluster 2<br>( <i>n</i> = 49) |
| Grateful         | 5.64 (1.41)                     | 6                             | 5                             |
| Indebted         | 4.21 (1.92)                     | 5                             | 3                             |
| Guilty           | 1.44 (1.99)                     | 2                             | 2                             |
| Moved            | 4.07 (1.82)                     | 5                             | 2                             |
| Uplifted         | 4.29 (1.75)                     | 5                             | 3                             |
| Connected        | 4.91 (1.60)                     | 5.43                          | 4                             |

*Note:* Centroids are the average of the scores for specific element of the cluster (e.g., Grateful or Moved) for that cluster (e.g., for Cluster 1). The centroid values should be interpreted with the means of the sample in mind. For example, similar to past research (Diener & Diener, 1996; Diener, Kanazawa, Suh, & Oishi, 2014), people reported higher positive emotions than negative emotions on average, so all clusters contain centroids reflecting higher positive emotions than negative emotions. However, because the mean for indebtedness across the sample is 4.21 (on a 7-point scale), we can interpret that participants in Cluster 1 have high levels of indebtedness relative to the rest of the sample.

Table D

*Table of Counts by Condition and Cluster Assignment for Study 1*

| Cluster Assignment | Gratitude Experience | Gratitude Letter | Near-Miss Relief | Total |
|--------------------|----------------------|------------------|------------------|-------|
| Cluster 1          | 33 (63.46%)          | 26 (78.79%)      | 26 (53.06%)      | 85    |
| Cluster 2          | 19 (36.54%)          | 7 (21.21%)       | 23 (46.94%)      | 49    |
| Total              | 52                   | 33               | 49               | 134   |

*Note:* Percentages represent proportion of each condition in each cluster. Participants per condition are lower than in other analyses because four participants were listwise deleted for failing to answer at least one of the six variables.

Table E

*Effects of Sex and Condition on Dependent Variables in Study 1*

| Source              | <i>df</i> | <i>F</i> | <i>p</i> | Condition             | <i>M(SE)</i> |              |
|---------------------|-----------|----------|----------|-----------------------|--------------|--------------|
| Grateful            |           |          |          |                       | <u>Men</u>   | <u>Women</u> |
| Condition           | 2         | 2.14     | .12      | Gratitude Experience: | 5.71 (0.27)  | 5.77 (0.30)  |
| Sex                 | 1         | 0.12     | .73      | Gratitude Letter:     | 5.96 (0.30)  | 6.00 (0.43)  |
| Condition X Sex     | 2         | 0.03     | .98      | Near-Miss Relief:     | 5.24 (0.28)  | 5.41 (0.30)  |
| Error               | 124       |          |          |                       |              |              |
| Relieved            |           |          |          |                       | <u>Men</u>   | <u>Women</u> |
| Condition           | 2         | 3.10     | .05      | Gratitude Experience: | 4.93 (0.34)  | 3.46 (0.39)  |
| Sex                 | 1         | 3.48     | .07      | Gratitude Letter:     | 5.00 (0.40)  | 4.55 (0.55)  |
| Condition X Sex     | 2         | 2.17     | .12      | Near-Miss Relief:     | 5.08 (0.37)  | 5.14 (0.39)  |
| Error               | 122       |          |          |                       |              |              |
| Indebted            |           |          |          |                       | <u>Men</u>   | <u>Women</u> |
| Condition           | 2         | 4.29     | .02      | Gratitude Experience: | 4.46 (0.35)  | 4.55 (0.40)  |
| Sex                 | 1         | 2.13     | .15      | Gratitude Letter:     | 4.86 (0.40)  | 4.36 (0.56)  |
| Condition X Sex     | 2         | 1.16     | .32      | Near-Miss Relief:     | 4.08 (0.37)  | 3.00 (0.40)  |
| Error               | 124       |          |          |                       |              |              |
| Guilty              |           |          |          |                       | <u>Men</u>   | <u>Women</u> |
| Condition           | 2         | 1.72     | .18      | Gratitude Experience: | 1.89 (0.28)  | 1.73 (0.31)  |
| Sex                 | 1         | 2.37     | .13      | Gratitude Letter:     | 2.05 (0.31)  | 1.46 (0.44)  |
| Condition X Sex     | 2         | 0.24     | .79      | Near-Miss Relief:     | 2.52 (0.29)  | 2.05 (0.31)  |
| Error               | 124       |          |          |                       |              |              |
| Moved               |           |          |          |                       | <u>Men</u>   | <u>Women</u> |
| Condition           | 2         | 5.09     | .01      | Gratitude Experience: | 4.46 (0.33)  | 3.96 (0.38)  |
| Sex                 | 1         | 1.26     | .26      | Gratitude Letter:     | 4.59 (0.38)  | 4.73 (0.53)  |
| Condition X Sex     | 2         | 0.54     | .58      | Near-Miss Relief:     | 3.76 (0.35)  | 3.05 (0.38)  |
| Error               | 124       |          |          |                       |              |              |
| Uplifted            |           |          |          |                       | <u>Men</u>   | <u>Women</u> |
| Condition           | 2         | 5.06     | .01      | Gratitude Experience: | 4.46 (0.32)  | 4.18 (0.36)  |
| Sex                 | 1         | 0.01     | .92      | Gratitude Letter:     | 4.91 (0.37)  | 5.18 (0.51)  |
| Condition X Sex     | 2         | 0.29     | .75      | Near-Miss Relief:     | 3.72 (0.34)  | 3.82 (0.36)  |
| Error               | 123       |          |          |                       |              |              |
| Connected to others |           |          |          |                       | <u>Men</u>   | <u>Women</u> |
| Condition           | 2         | 5.02     | .01      | Gratitude Experience: | 5.61 (0.29)  | 5.16 (0.29)  |
| Sex                 | 1         | 1.21     | .27      | Gratitude Letter:     | 5.16 (0.33)  | 4.96 (0.33)  |
| Condition X Sex     | 2         | 0.07     | .93      | Near-Miss Relief:     | 4.54 (0.31)  | 4.27 (0.33)  |
| Error               | 123       |          |          |                       |              |              |
| Happy               |           |          |          |                       | <u>Men</u>   | <u>Women</u> |
| Condition           | 2         | 0.57     | .57      | Gratitude Experience: | 5.57 (0.28)  | 5.55 (0.31)  |
| Sex                 | 1         | 0.07     | .79      | Gratitude Letter:     | 5.73 (0.31)  | 5.73 (0.44)  |
| Condition X Sex     | 2         | 0.05     | .95      | Near-Miss Relief:     | 5.46 (0.30)  | 5.27 (0.31)  |
| Error               | 123       |          |          |                       |              |              |
| Worried/anxious     |           |          |          |                       | <u>Men</u>   | <u>Women</u> |
| Condition           | 2         | 1.28     | .28      | Gratitude Experience: | 2.00 (0.31)  | 2.14 (0.35)  |
| Sex                 | 1         | 1.08     | .30      | Gratitude Letter:     | 2.14 (0.35)  | 2.82 (0.49)  |
| Condition X Sex     | 2         | 0.33     | .72      | Near-Miss Relief:     | 2.52 (0.33)  | 2.64 (0.35)  |
| Error               | 124       |          |          |                       |              |              |
| Angry               |           |          |          |                       | <u>Men</u>   | <u>Women</u> |
| Condition           | 2         | 1.44     | .24      | Gratitude Experience: | 1.64 (0.25)  | 1.36 (0.28)  |
| Sex                 | 1         | 2.21     | .14      | Gratitude Letter:     | 1.64 (0.28)  | 1.55 (0.39)  |
| Condition X Sex     | 2         | 0.55     | .58      | Near-Miss Relief:     | 2.28 (0.26)  | 1.59 (0.28)  |
| Error               | 124       |          |          |                       |              |              |

Table E continued

| Source                     | <i>df</i> | <i>F</i> | <i>p</i> | Condition             | <i>M(SE)</i> |              |
|----------------------------|-----------|----------|----------|-----------------------|--------------|--------------|
| Frustrated                 |           |          |          |                       | <u>Men</u>   | <u>Women</u> |
| Condition                  | 2         | 1.23     | .30      | Gratitude Experience: | 1.96 (0.30)  | 1.77 (0.34)  |
| Sex                        | 1         | 0.74     | .39      | Gratitude Letter:     | 1.96 (0.34)  | 1.91 (0.48)  |
| Condition X Sex            | 2         | 0.22     | .80      | Near-Miss Relief:     | 2.60 (0.32)  | 2.09 (0.34)  |
| Error                      | 124       |          |          |                       |              |              |
| Depressed/blue             |           |          |          |                       | <u>Men</u>   | <u>Women</u> |
| Condition                  | 2         | 1.47     | .24      | Gratitude Experience: | 1.64 (0.29)  | 1.86 (0.33)  |
| Sex                        | 1         | 0.60     | .44      | Gratitude Letter:     | 2.05 (0.33)  | 1.73 (0.47)  |
| Condition X Sex            | 2         | 0.80     | .45      | Near-Miss Relief:     | 2.56 (0.31)  | 2.00 (0.33)  |
| Error                      | 124       |          |          |                       |              |              |
| Joyful                     |           |          |          |                       | <u>Men</u>   | <u>Women</u> |
| Condition                  | 2         | 1.55     | .22      | Gratitude Experience: | 4.75 (0.31)  | 4.46 (0.35)  |
| Sex                        | 1         | 0.10     | .75      | Gratitude Letter:     | 5.05 (0.35)  | 5.36 (0.49)  |
| Condition X Sex            | 2         | 0.41     | .66      | Near-Miss Relief:     | 4.76 (0.32)  | 4.46 (0.35)  |
| Error                      | 124       |          |          |                       |              |              |
| Nervous                    |           |          |          |                       | <u>Men</u>   | <u>Women</u> |
| Condition                  | 2         | 2.29     | .11      | Gratitude Experience: | 1.82 (0.24)  | 1.46 (0.27)  |
| Sex                        | 1         | 5.01     | .03      | Gratitude Letter:     | 2.09 (0.27)  | 1.64 (0.39)  |
| Condition X Sex            | 2         | 0.30     | .74      | Near-Miss Relief:     | 2.58 (0.26)  | 1.82 (0.27)  |
| Error                      | 123       |          |          |                       |              |              |
| Inspired                   |           |          |          |                       | <u>Men</u>   | <u>Women</u> |
| Condition                  | 2         | 4.59     | .01      | Gratitude Experience: | 4.54 (0.34)  | 4.00 (0.38)  |
| Sex                        | 1         | 0.03     | .88      | Gratitude Letter:     | 5.05 (0.39)  | 5.64 (0.54)  |
| Condition X Sex            | 2         | 0.96     | .39      | Near-Miss Relief:     | 4.08 (0.36)  | 4.18 (0.38)  |
| Error                      | 123       |          |          |                       |              |              |
| Scared                     |           |          |          |                       | <u>Men</u>   | <u>Women</u> |
| Condition                  | 2         | 0.80     | .45      | Gratitude Experience: | 2.25 (0.29)  | 1.50 (0.33)  |
| Sex                        | 1         | 0.83     | .36      | Gratitude Letter:     | 1.96 (0.33)  | 2.36 (0.47)  |
| Condition X Sex            | 2         | 1.32     | .27      | Near-Miss Relief:     | 2.48 (0.31)  | 2.05 (0.33)  |
| Error                      | 124       |          |          |                       |              |              |
| Upset                      |           |          |          |                       | <u>Men</u>   | <u>Women</u> |
| Condition                  | 2         | 1.43     | .24      | Gratitude Experience: | 1.61 (0.28)  | 1.86 (0.31)  |
| Sex                        | 1         | 0.11     | .74      | Gratitude Letter:     | 1.82 (0.31)  | 1.82 (0.44)  |
| Condition X Sex            | 2         | 0.88     | .42      | Near-Miss Relief:     | 2.48 (0.29)  | 1.96 (0.31)  |
| Error                      | 124       |          |          |                       |              |              |
| Unhappy                    |           |          |          |                       | <u>Men</u>   | <u>Women</u> |
| Condition                  | 2         | 1.33     | .27      | Gratitude Experience: | 1.75 (0.28)  | 2.05 (0.31)  |
| Sex                        | 1         | 0.14     | .71      | Gratitude Letter:     | 1.68 (0.31)  | 1.91 (0.44)  |
| Condition X Sex            | 2         | 0.42     | .66      | Near-Miss Relief:     | 2.40 (0.29)  | 2.18 (0.31)  |
| Error                      | 124       |          |          |                       |              |              |
| Pleased                    |           |          |          |                       | <u>Men</u>   | <u>Women</u> |
| Condition                  | 2         | 0.18     | 0.84     | Gratitude Experience: | 4.93 (0.32)  | 4.55 (0.36)  |
| Sex                        | 1         | 0.80     | 0.37     | Gratitude Letter:     | 4.96 (0.36)  | 4.73 (0.51)  |
| Condition X Sex            | 2         | 0.03     | 0.97     | Near-Miss Relief:     | 4.72 (0.34)  | 4.50 (0.36)  |
| Error                      | 124       |          |          |                       |              |              |
| Positive Emotion Composite |           |          |          |                       | <u>Men</u>   | <u>Women</u> |
| Condition                  | 2         | 2.77     | .07      | Gratitude Experience: | 5.00 (0.22)  | 4.56 (0.25)  |
| Sex                        | 1         | 0.62     | .43      | Gratitude Letter:     | 5.14 (0.24)  | 5.21 (0.35)  |
| Condition X Sex            | 2         | 0.45     | .64      | Near-Miss Relief:     | 4.60 (0.23)  | 4.46 (0.25)  |
| Error                      | 124       |          |          |                       |              |              |

Table E continued

| Source                        | <i>df</i> | <i>F</i> | <i>p</i> | Condition             | <i>M(SE)</i> |              |
|-------------------------------|-----------|----------|----------|-----------------------|--------------|--------------|
| Negative Emotion Composite    |           |          |          |                       | <u>Men</u>   | <u>Women</u> |
| Condition                     | 2         | 1.11     | .33      | Gratitude Experience: | 2.10 (0.21)  | 2.03 (0.23)  |
| Sex                           | 1         | 1.22     | .27      | Gratitude Letter:     | 2.22 (0.23)  | 2.16 (0.33)  |
| Condition X Sex               | 2         | 0.61     | .55      | Near-Miss Relief:     | 2.65 (0.22)  | 2.14 (0.23)  |
| Error                         | 124       |          |          |                       |              |              |
| Emodiversity: All emotions    |           |          |          |                       | <u>Men</u>   | <u>Women</u> |
| Condition                     | 2         | 1.14     | .32      | Gratitude Experience: | 2.11 (0.06)  | 1.98 (0.06)  |
| Sex                           | 1         | 2.73     | .10      | Gratitude Letter:     | 2.11 (0.07)  | 2.13 (0.09)  |
| Condition X Sex               | 2         | 0.77     | .47      | Near-Miss Relief:     | 2.09 (0.06)  | 1.93 (0.06)  |
| Error                         | 118       |          |          |                       |              |              |
| Emodiversity: Social emotions |           |          |          |                       | <u>Men</u>   | <u>Women</u> |
| Condition                     | 2         | 3.82     | .03      | Gratitude Experience: | 0.89 (0.16)  | 0.84 (0.19)  |
| Sex                           | 1         | 1.91     | .17      | Gratitude Letter:     | 1.20 (0.19)  | 0.95 (0.26)  |
| Condition X Sex               | 2         | 0.38     | .68      | Near-Miss Relief:     | 1.53 (0.18)  | 1.17 (0.19)  |
| Error                         | 123       |          |          |                       |              |              |

*Note:* No significant condition by interaction effects in Study 1.

Table F

*Bivariate Correlations Among Variables in Study 2*

| Variable               | 1    | 2     | 3   | 4    | 5   | 6    | 7    | 8    | 9    | 10   | 11   | 12   | 13   | 14   | 15  | 16  | 17   | 18  | 19 |  |
|------------------------|------|-------|-----|------|-----|------|------|------|------|------|------|------|------|------|-----|-----|------|-----|----|--|
| 1. Grateful            | --   |       |     |      |     |      |      |      |      |      |      |      |      |      |     |     |      |     |    |  |
| 2. Relieved            | .55  | --    |     |      |     |      |      |      |      |      |      |      |      |      |     |     |      |     |    |  |
| 3. Indebted            | .48  | .16   | --  |      |     |      |      |      |      |      |      |      |      |      |     |     |      |     |    |  |
| 4. Guilty              | .01  | -.02  | .15 | --   |     |      |      |      |      |      |      |      |      |      |     |     |      |     |    |  |
| 5. Moved               | .54  | .33   | .45 | .28  | --  |      |      |      |      |      |      |      |      |      |     |     |      |     |    |  |
| 6. Uplifted            | .58  | .40   | .53 | .13  | .73 | --   |      |      |      |      |      |      |      |      |     |     |      |     |    |  |
| 7. Connected to others | .33  | .13   | .36 | -.10 | .27 | .30  | --   |      |      |      |      |      |      |      |     |     |      |     |    |  |
| 8. Happy               | .74  | .50   | .29 | -.09 | .43 | .50  | .20  | --   |      |      |      |      |      |      |     |     |      |     |    |  |
| 9. Worried/anxious     | -.05 | -.09  | .16 | .60  | .10 | .02  | -.06 | -.22 | --   |      |      |      |      |      |     |     |      |     |    |  |
| 10. Angry              | -.11 | .09   | .09 | .63  | .16 | .02  | -.04 | -.24 | .72  | --   |      |      |      |      |     |     |      |     |    |  |
| 11. Frustrated         | -.05 | .07   | .07 | .64  | .18 | -.01 | -.02 | -.23 | .66  | .86  | --   |      |      |      |     |     |      |     |    |  |
| 12. Depressed/blue     | -.05 | -.01  | .15 | .54  | .15 | .01  | .03  | -.29 | .66  | .70  | .79  | --   |      |      |     |     |      |     |    |  |
| 13. Joyful             | .63  | .44   | .37 | -.02 | .54 | .54  | .433 | .69  | -.13 | -.03 | -.06 | -.20 | --   |      |     |     |      |     |    |  |
| 14. Nervous            | -.02 | .05   | .15 | .57  | .22 | .06  | .02  | -.20 | .70  | .71  | .78  | .72  | -.06 | --   |     |     |      |     |    |  |
| 15. Inspired           | .59  | .36   | .43 | .08  | .62 | .62  | .38  | .56  | -.04 | .03  | .04  | -.03 | .75  | .09  | --  |     |      |     |    |  |
| 16. Scared             | .03  | .13   | .16 | .56  | .25 | .09  | .09  | -.11 | .61  | .67  | .70  | .65  | .08  | .80  | .21 | --  |      |     |    |  |
| 17. Upset              | .01  | .07   | .14 | .61  | .29 | .10  | .03  | -.12 | .68  | .75  | .78  | .67  | .01  | .89  | .10 | .80 | --   |     |    |  |
| 18. Unhappy            | -.04 | -.003 | .15 | .67  | .20 | .07  | .03  | -.26 | .75  | .79  | .77  | .78  | -.09 | .71  | .06 | .72 | .66  | --  |    |  |
| 19. Pleased            | .60  | .51   | .44 | -.04 | .42 | .58  | .32  | .60  | -.02 | .04  | .02  | .002 | .53  | -.06 | .50 | .08 | -.01 | .04 | -- |  |

*Note:* Correlations are all based on at least 124 participants. Correlations .18 and above are significant at  $p \leq .05$ . Correlations .22 and above are significant at  $p \leq .01$ . Correlations .29 and above are significant at  $p \leq .001$ .



Table G

*Cluster Centroids for Study 2*

| All Participants |                                 |                               |                               |
|------------------|---------------------------------|-------------------------------|-------------------------------|
| Item             | <i>M (SD)</i> across conditions | Cluster 1<br>( <i>n</i> = 64) | Cluster 2<br>( <i>n</i> = 60) |
| Grateful         | 5.23 (1.65)                     | 6                             | 4                             |
| Indebted         | 3.73 (1.98)                     | 5                             | 2                             |
| Guilty           | 1.96 (1.48)                     | 2                             | 2                             |
| Moved            | 3.88 (1.89)                     | 5                             | 2                             |
| Uplifted         | 4.26 (1.77)                     | 5                             | 3                             |
| Connected        | 4.60 (1.83)                     | 5.03                          | 4.10                          |

*Note:* Centroids are the average of the scores for specific element of the cluster (e.g., Grateful or Moved) for that cluster (e.g., for Cluster 1).

Table H

*Table of Counts by Condition and Cluster Assignment for Study 2*

| Cluster Assignment | Gratitude Experience | Near-Miss Relief | Task-Completion Relief | Total |
|--------------------|----------------------|------------------|------------------------|-------|
| Cluster 1          | 27 (62.79%)          | 25 (49.02%)      | 12 (40.00%)            | 64    |
| Cluster 2          | 16 (37.21%)          | 26 (50.98%)      | 18 (60.00%)            | 60    |
| Total              | 43                   | 51               | 30                     | 124   |

*Note:* Percentages represent proportion of each condition in each cluster. Participants per condition are lower than in other analyses because six participants were listwise deleted for failing to answer at least one of the six variables.

Table I

*Effects of Sex and Condition on Dependent Variables in Study 2*

| Source              | <i>df</i> | <i>F</i> | <i>p</i> | Condition               | <i>M(SE)</i> |              |
|---------------------|-----------|----------|----------|-------------------------|--------------|--------------|
| Grateful            |           |          |          |                         | <u>Men</u>   | <u>Women</u> |
| Condition           | 2         | 4.09     | .02      | Gratitude Experience:   | 5.64 (0.28)  | 5.80 (0.50)  |
| Sex                 | 1         | 3.34     | .07      | Near-Miss Relief:       | 5.37 (0.27)  | 3.94 (0.40)  |
| Condition X Sex     | 2         | 2.47     | .09      | Task-Completion Relief: | 5.29 (0.38)  | 4.89 (0.37)  |
| Error               | 123       |          |          |                         |              |              |
| Relieved            |           |          |          |                         | <u>Men</u>   | <u>Women</u> |
| Condition           | 2         | 1.72     | .18      | Gratitude Experience:   | 4.49 (0.32)  | 3.70 (0.58)  |
| Sex                 | 1         | 6.36     | .01      | Near-Miss Relief:       | 5.09 (0.31)  | 4.06 (0.46)  |
| Condition X Sex     | 2         | 0.04     | .96      | Task-Completion Relief: | 5.35 (0.44)  | 4.50 (0.43)  |
| Error               | 122       |          |          |                         |              |              |
| Indebted            |           |          |          |                         | <u>Men</u>   | <u>Women</u> |
| Condition           | 2         | 10.38    | < .001   | Gratitude Experience:   | 4.88 (0.31)  | 4.50 (0.56)  |
| Sex                 | 1         | 5.96     | .02      | Near-Miss Relief:       | 3.71 (0.30)  | 2.13 (0.44)  |
| Condition X Sex     | 2         | 1.31     | .27      | Task-Completion Relief: | 3.33 (0.46)  | 2.77 (0.43)  |
| Error               | 120       |          |          |                         |              |              |
| Guilty              |           |          |          |                         | <u>Men</u>   | <u>Women</u> |
| Condition           | 2         | 1.05     | .35      | Gratitude Experience:   | 2.03 (0.26)  | 1.00 (0.46)  |
| Sex                 | 1         | 7.63     | .007     | Near-Miss Relief:       | 2.40 (0.25)  | 1.56 (0.36)  |
| Condition X Sex     | 2         | 0.32     | .73      | Task-Completion Relief: | 2.18 (0.35)  | 1.71 (0.35)  |
| Error               | 121       |          |          |                         |              |              |
| Moved               |           |          |          |                         | <u>Men</u>   | <u>Women</u> |
| Condition           | 2         | 4.11     | .02      | Gratitude Experience:   | 4.39 (0.32)  | 4.70 (0.58)  |
| Sex                 | 1         | 2.25     | .14      | Near-Miss Relief:       | 4.14 (0.31)  | 3.06 (0.46)  |
| Condition X Sex     | 2         | 1.38     | .26      | Task-Completion Relief: | 3.71 (0.44)  | 2.89 (0.43)  |
| Error               | 123       |          |          |                         |              |              |
| Uplifted            |           |          |          |                         | <u>Men</u>   | <u>Women</u> |
| Condition           | 2         | 2.37     | .10      | Gratitude Experience:   | 4.76 (0.30)  | 4.60 (0.55)  |
| Sex                 | 1         | 3.72     | .06      | Near-Miss Relief:       | 4.40 (0.29)  | 3.19 (.44)   |
| Condition X Sex     | 2         | 0.87     | .42      | Task-Completion Relief: | 4.35 (0.42)  | 3.78 (0.41)  |
| Error               | 123       |          |          |                         |              |              |
| Connected to others |           |          |          |                         | <u>Men</u>   | <u>Women</u> |
| Condition           | 2         | 7.67     | .001     | Gratitude Experience:   | 5.18 (0.31)  | 6.10 (0.56)  |
| Sex                 | 1         | 0.17     | .68      | Near-Miss Relief:       | 4.09 (0.30)  | 4.00 (0.44)  |
| Condition X Sex     | 2         | 1.24     | .29      | Task-Completion Relief: | 4.66 (0.44)  | 4.25 (0.42)  |
| Error               | 122       |          |          |                         |              |              |
| Happy               |           |          |          |                         | <u>Men</u>   | <u>Women</u> |
| Condition           | 2         | 1.68     | .19      | Gratitude Experience:   | 5.18 (0.29)  | 5.60 (0.52)  |
| Sex                 | 1         | 1.40     | .24      | Near-Miss Relief:       | 5.31 (0.28)  | 4.06 (0.41)  |
| Condition X Sex     | 2         | 2.43     | .09      | Task-Completion Relief: | 5.18 (0.40)  | 4.89 (0.39)  |
| Error               | 123       |          |          |                         |              |              |
| Worried/anxious     |           |          |          |                         | <u>Men</u>   | <u>Women</u> |
| Condition           | 2         | 1.45     | .24      | Gratitude Experience:   | 2.33 (0.29)  | 1.60 (0.52)  |
| Sex                 | 1         | 2.52     | .12      | Near-Miss Relief:       | 2.68 (0.28)  | 2.50 (0.41)  |
| Condition X Sex     | 2         | 0.30     | .74      | Task-Completion Relief: | 2.82 (0.40)  | 2.22 (0.39)  |
| Error               | 122       |          |          |                         |              |              |
| Angry               |           |          |          |                         | <u>Men</u>   | <u>Women</u> |
| Condition           | 2         | 0.91     | .41      | Gratitude Experience:   | 1.88 (0.25)  | 1.20 (0.45)  |
| Sex                 | 1         | 6.29     | .01      | Near-Miss Relief:       | 2.18 (0.24)  | 1.75 (0.36)  |
| Condition X Sex     | 2         | 0.35     | .71      | Task-Completion Relief: | 2.41 (0.35)  | 1.44 (0.34)  |
| Error               | 122       |          |          |                         |              |              |

Table I continued

| Source                            | df  | F    | p    | Condition               | M(SE)       |             |
|-----------------------------------|-----|------|------|-------------------------|-------------|-------------|
|                                   |     |      |      |                         | Men         | Women       |
| <b>Frustrated</b>                 |     |      |      |                         |             |             |
| Condition                         | 2   | 1.41 | .25  | Gratitude Experience:   | 1.94 (0.26) | 1.20 (0.46) |
| Sex                               | 1   | 6.35 | .01  | Near-Miss Relief:       | 2.47 (0.25) | 1.81 (0.37) |
| Condition X Sex                   | 2   | 0.01 | .99  | Task-Completion Relief: | 2.38 (0.37) | 1.61 (0.35) |
| Error                             | 120 |      |      |                         |             |             |
| <b>Depressed/blue</b>             |     |      |      |                         |             |             |
| Condition                         | 2   | 1.53 | .22  | Gratitude Experience:   | 2.03 (0.28) | 1.20 (0.52) |
| Sex                               | 1   | 3.48 | .06  | Near-Miss Relief:       | 2.46 (0.28) | 1.75 (0.41) |
| Condition X Sex                   | 2   | 0.55 | .58  | Task-Completion Relief: | 2.29 (0.40) | 2.17 (0.39) |
| Error                             | 123 |      |      |                         |             |             |
| <b>Joyful</b>                     |     |      |      |                         |             |             |
| Condition                         | 2   | 4.94 | .009 | Gratitude Experience:   | 4.64 (0.33) | 5.40 (0.59) |
| Sex                               | 1   | 3.39 | .07  | Near-Miss Relief:       | 4.43 (0.32) | 2.88 (0.47) |
| Condition X Sex                   | 2   | 3.79 | .03  | Task-Completion Relief: | 4.65 (0.45) | 3.44 (0.44) |
| Error                             | 123 |      |      |                         |             |             |
| <b>Nervous</b>                    |     |      |      |                         |             |             |
| Condition                         | 2   | 1.40 | .25  | Gratitude Experience:   | 2.00 (0.27) | 1.20 (0.49) |
| Sex                               | 1   | 5.67 | .02  | Near-Miss Relief:       | 2.46 (0.26) | 1.80 (0.40) |
| Condition X Sex                   | 2   | 0.02 | .98  | Task-Completion Relief: | 2.53 (0.38) | 1.83 (0.37) |
| Error                             | 122 |      |      |                         |             |             |
| <b>Inspired</b>                   |     |      |      |                         |             |             |
| Condition                         | 2   | 3.69 | .03  | Gratitude Experience:   | 4.46 (0.32) | 5.20 (0.59) |
| Sex                               | 1   | 3.78 | .05  | Near-Miss Relief:       | 4.29 (0.31) | 3.00 (0.47) |
| Condition X Sex                   | 2   | 3.75 | .03  | Task-Completion Relief: | 5.00 (0.45) | 3.44 (0.44) |
| Error                             | 123 |      |      |                         |             |             |
| <b>Scared</b>                     |     |      |      |                         |             |             |
| Condition                         | 2   | 1.56 | .21  | Gratitude Experience:   | 1.88 (0.26) | 1.10 (0.48) |
| Sex                               | 1   | 9.98 | .002 | Near-Miss Relief:       | 2.46 (0.26) | 1.63 (0.38) |
| Condition X Sex                   | 2   | 0.15 | .86  | Task-Completion Relief: | 2.65 (0.37) | 1.50 (0.36) |
| Error                             | 123 |      |      |                         |             |             |
| <b>Upset</b>                      |     |      |      |                         |             |             |
| Condition                         | 2   | 1.91 | .15  | Gratitude Experience:   | 1.76 (0.27) | 1.00 (0.48) |
| Sex                               | 1   | 5.85 | .02  | Near-Miss Relief:       | 2.49 (0.26) | 1.60 (0.40) |
| Condition X Sex                   | 2   | 0.14 | .87  | Task-Completion Relief: | 2.24 (0.37) | 1.72 (0.36) |
| Error                             | 122 |      |      |                         |             |             |
| <b>Unhappy</b>                    |     |      |      |                         |             |             |
| Condition                         | 2   | 0.59 | .56  | Gratitude Experience:   | 1.94 (0.23) | 1.10 (0.43) |
| Sex                               | 1   | 5.60 | .02  | Near-Miss Relief:       | 2.03 (0.23) | 1.69 (0.34) |
| Condition X Sex                   | 2   | 0.33 | .72  | Task-Completion Relief: | 2.00 (0.33) | 1.33 (0.32) |
| Error                             | 123 |      |      |                         |             |             |
| <b>Pleased</b>                    |     |      |      |                         |             |             |
| Condition                         | 2   | 4.16 | .02  | Gratitude Experience:   | 4.58 (0.29) | 5.30 (0.52) |
| Sex                               | 1   | 4.31 | .04  | Near-Miss Relief:       | 4.77 (0.28) | 2.94 (0.41) |
| Condition X Sex                   | 2   | 5.43 | .006 | Task-Completion Relief: | 5.00 (0.41) | 4.11 (0.39) |
| Error                             | 122 |      |      |                         |             |             |
| <b>Positive Emotion Composite</b> |     |      |      |                         |             |             |
| Condition                         | 2   | 4.78 | .01  | Gratitude Experience:   | 4.81 (0.22) | 5.16 (0.40) |
| Sex                               | 1   | 4.66 | .03  | Near-Miss Relief:       | 4.65 (0.22) | 3.46 (0.32) |
| Condition X Sex                   | 2   | 3.33 | .04  | Task-Completion Relief: | 4.77 (0.31) | 4.02 (0.30) |
| Error                             | 123 |      |      |                         |             |             |

Table I continued

| Source                        | <i>df</i> | <i>F</i> | <i>p</i> | Condition               | <i>M(SE)</i> |              |
|-------------------------------|-----------|----------|----------|-------------------------|--------------|--------------|
| Negative Emotion Composite    |           |          |          |                         | <u>Men</u>   | <u>Women</u> |
| Condition                     | 2         | 0.60     | .55      | Gratitude Experience:   | 2.28 (0.21)  | 1.50 (0.38)  |
| Sex                           | 1         | 8.91     | .003     | Near-Miss Relief:       | 2.54 (0.21)  | 1.84 (0.30)  |
| Condition X Sex               | 2         | 0.03     | .97      | Task-Completion Relief: | 2.46 (0.30)  | 1.82 (0.29)  |
| Error                         | 123       |          |          |                         |              |              |
| Emodiversity: All emotions    |           |          |          |                         | <u>Men</u>   | <u>Women</u> |
| Condition                     | 2         | 0.74     | .48      | Gratitude Experience:   | 2.49 (0.07)  | 2.29 (0.13)  |
| Sex                           | 1         | 5.69     | .02      | Near-Miss Relief:       | 2.37 (0.07)  | 2.22 (0.11)  |
| Condition X Sex               | 2         | 0.16     | .85      | Task-Completion Relief: | 2.54 (0.11)  | 2.28 (0.10)  |
| Error                         | 109       |          |          |                         |              |              |
| Emodiversity: Social emotions |           |          |          |                         | <u>Men</u>   | <u>Women</u> |
| Condition                     | 2         | 2.24     | .11      | Gratitude Experience:   | 1.57 (0.07)  | 1.52 (0.12)  |
| Sex                           | 1         | 0.89     | .35      | Near-Miss Relief:       | 1.43 (0.06)  | 1.33 (0.09)  |
| Condition X Sex               | 2         | 0.04     | .96      | Task-Completion Relief: | 1.41 (0.10)  | 1.34 (0.09)  |
| Error                         | 117       |          |          |                         |              |              |

*Note:* We found a significant condition by sex interaction on joyful, inspired, pleased, and on the positive emotion composite such that women in the gratitude condition reported more positivity than men in the gratitude condition or men or women in any other condition. We also found a marginal condition by sex interaction on happy and grateful in the same direction. In contrast, past research has found that men benefit more from gratitude exercises than women (Watkins, Uher, & Pichinevskiy, 2014).

Table J

*Means (SDs) and Contrast Tests for Study 3: U.S. Sample*

|                               | Experimental Conditions                                                |              |                                                                       |              |                                                                        |                                              |                    |                    |            |
|-------------------------------|------------------------------------------------------------------------|--------------|-----------------------------------------------------------------------|--------------|------------------------------------------------------------------------|----------------------------------------------|--------------------|--------------------|------------|
|                               | Gratitude Condition                                                    |              | Kindness Condition                                                    |              | Control Condition                                                      |                                              | Contrast 2         | Contrast 3         | Contrast 4 |
|                               | <i>Contrast 1: +1</i><br><i>Contrast 2: +1</i><br><i>Contrast 3: 0</i> |              | <i>Contrast 1: -1</i><br><i>Contrast 2: 0</i><br><i>Contrast 3: 1</i> |              | <i>Contrast 1: 0</i><br><i>Contrast 2: -1</i><br><i>Contrast 3: -1</i> |                                              |                    |                    |            |
| <i>M(SD)</i>                  | <i>n</i>                                                               | <i>M(SD)</i> | <i>n</i>                                                              | <i>M(SD)</i> | <i>n</i>                                                               | <i>t</i> -contrast or<br><i>F</i> -statistic | <i>t</i> -contrast | <i>t</i> -contrast |            |
| <b>Grateful</b> (single-item) | 6.45 (1.04)                                                            | 66           | 5.53 (1.51)                                                           | 64           | 4.06 (1.66)                                                            | 63                                           | 4.05***            | 9.77***            | 5.22***    |
| <b>Gratitude</b> (multi-item) | 5.70 (0.97)                                                            | 66           | 5.85 (0.99)                                                           | 64           | 5.66 (1.04)                                                            | 64                                           | -0.85              | 0.27               | 1.11       |
| <b>Indebted</b>               | 5.05 (1.84)                                                            | 66           | 3.33 (1.93)                                                           | 64           | 2.44 (1.57)                                                            | 64                                           | 5.48***            | 8.33***            | 2.82**     |
| <b>Guilty</b>                 | 2.56 (1.76)                                                            | 66           | 2.33 (1.79)                                                           | 64           | 2.25 (1.55)                                                            | 63                                           | 0.78               | 1.02               | 0.25       |
| <b>Moved</b>                  | 5.48 (1.44)                                                            | 66           | 4.66 (1.46)                                                           | 64           | 2.58 (1.55)                                                            | 64                                           | 3.18**             | 11.17***           | 7.92***    |
| <b>Uplifted</b>               | 5.06 (1.71)                                                            | 66           | 4.53 (1.44)                                                           | 64           | 2.77 (1.56)                                                            | 64                                           | 1.92 <sup>†</sup>  | 8.31***            | 6.35***    |
| <b>Embarrassed</b>            | 2.73 (1.30)                                                            | 66           | 2.78 (1.44)                                                           | 64           | 3.02 (1.59)                                                            | 64                                           | -0.21              | -1.14              | -0.92      |
| <b>Ashamed</b>                | 3.34 (1.56)                                                            | 66           | 3.79 (1.41)                                                           | 64           | 3.77 (1.65)                                                            | 64                                           | -1.72 <sup>†</sup> | -1.51              | 0.09       |
| Connectedness (multi-item)    | 3.72 (0.69)                                                            | 66           | 3.57 (0.62)                                                           | 64           | 3.58 (0.73)                                                            | 63                                           | 0.94               |                    |            |
| Happy                         | 5.85 (1.46)                                                            | 65           | 5.13 (1.52)                                                           | 63           | 4.11 (1.51)                                                            | 62                                           | 21.49***           |                    |            |
| Worried/anxious               | 2.12 (1.82)                                                            | 66           | 1.88 (1.80)                                                           | 64           | 2.70 (1.79)                                                            | 64                                           | 3.56*              |                    |            |
| Angry                         | 1.62 (1.15)                                                            | 66           | 1.44 (1.07)                                                           | 64           | 1.70 (1.16)                                                            | 64                                           | 0.93               |                    |            |
| Frustrated                    | 2.29 (1.80)                                                            | 66           | 2.06 (1.45)                                                           | 64           | 2.70 (1.69)                                                            | 64                                           | 2.48 <sup>†</sup>  |                    |            |
| Depressed/blue                | 2.36 (1.55)                                                            | 66           | 2.23 (1.65)                                                           | 64           | 2.16 (1.63)                                                            | 64                                           | 0.28               |                    |            |
| Joyful                        | 3.97 (1.71)                                                            | 66           | 4.05 (1.56)                                                           | 64           | 3.14 (1.68)                                                            | 64                                           | 5.95**             |                    |            |
| Unhappy                       | 1.95 (1.40)                                                            | 66           | 2.20 (1.62)                                                           | 64           | 2.14 (1.53)                                                            | 64                                           | 0.48               |                    |            |
| Pleased                       | 4.45 (1.66)                                                            | 65           | 4.45 (1.44)                                                           | 64           | 3.69 (1.51)                                                            | 64                                           | 5.25**             |                    |            |
| Enjoyment/fun                 | 3.58 (1.91)                                                            | 64           | 3.44 (1.60)                                                           | 64           | 3.05 (1.63)                                                            | 64                                           | 1.65               |                    |            |
| Positive Emotion Composite    | 4.97 (1.15)                                                            | 66           | 4.54 (1.07)                                                           | 64           | 3.34 (1.16)                                                            | 64                                           | 36.57***           |                    |            |

|                                      |             |    |             |    |             |    |      |         |         |
|--------------------------------------|-------------|----|-------------|----|-------------|----|------|---------|---------|
| Negative Emotion Composite           | 2.78 (0.96) | 66 | 2.56 (0.95) | 64 | 2.65 (1.08) | 64 | 0.80 |         |         |
| Emodiversity: All emotions           | 2.36 (0.26) | 64 | 2.35 (0.23) | 63 | 2.25 (0.38) | 61 | 1.70 |         |         |
| <b>Emodiversity: Social emotions</b> | 1.68 (0.23) | 66 | 1.65 (0.26) | 64 | 1.42 (0.47) | 62 | 0.80 | 3.94*** | 3.32*** |

*Note:* A *t*-contrast is provided for emotions on which we performed a focused test (emboldened in the table). An omnibus *F*-statistic is reported for all other emotions. The degrees of freedom for the emodiversity analyses are fewer than for the composites because the composites allow for some missing items (we allowed three [out of seven] missing item in the positive emotion composite and up to four [out of nine] missing items in the negative emotion composite), whereas the emodiversity equation does not tolerate any missingness.

†*p* ≤ .10. \**p* ≤ .05. \*\**p* ≤ .01. \*\*\**p* ≤ .001.

Table K

Means (SDs) and Contrast Tests for Study 3: South Korean Sample

|                               | Experimental Conditions                           |          |                                                  |          |                                                   |          |                                              |                    |                    |
|-------------------------------|---------------------------------------------------|----------|--------------------------------------------------|----------|---------------------------------------------------|----------|----------------------------------------------|--------------------|--------------------|
|                               | Gratitude Condition                               |          | Kindness Condition                               |          | Control Condition                                 |          | Contrast 2                                   | Contrast 3         | Contrast 4         |
|                               | Contrast 1: +1<br>Contrast 2: +1<br>Contrast 3: 0 |          | Contrast 1: -1<br>Contrast 2: 0<br>Contrast 3: 1 |          | Contrast 1: 0<br>Contrast 2: -1<br>Contrast 3: -1 |          |                                              |                    |                    |
|                               | <i>M(SD)</i>                                      | <i>n</i> | <i>M(SD)</i>                                     | <i>n</i> | <i>M(SD)</i>                                      | <i>n</i> | <i>t</i> -contrast or<br><i>F</i> -statistic | <i>t</i> -contrast | <i>t</i> -contrast |
| <b>Grateful</b> (single-item) | 6.29 (0.66)                                       | 82       | 4.79 (1.58)                                      | 72       | 4.57 (1.63)                                       | 79       | 7.50***                                      | 8.73***            | 0.85               |
| <b>Gratitude</b> (multi-item) | 5.47 (1.02)                                       | 82       | 5.39 (1.02)                                      | 72       | 5.17 (1.01)                                       | 79       | 0.48                                         | 1.87 <sup>†</sup>  | 1.33               |
| <b>Indebted</b>               | 4.26 (1.85)                                       | 82       | 2.31 (1.52)                                      | 72       | 2.42 (1.63)                                       | 79       | 7.20***                                      | 6.71***            | -0.44              |
| <b>Guilty</b>                 | 2.65 (1.80)                                       | 82       | 2.03 (1.33)                                      | 72       | 2.94 (1.93)                                       | 79       | 2.44*                                        | -0.99              | -3.39***           |
| <b>Moved</b>                  | 5.65 (1.02)                                       | 82       | 4.49 (1.39)                                      | 72       | 3.28 (1.65)                                       | 79       | 5.82***                                      | 10.91***           | 4.88***            |
| <b>Uplifted</b>               | 5.23 (1.35)                                       | 82       | 4.65 (1.45)                                      | 72       | 3.76 (1.53)                                       | 79       | 2.48**                                       | 6.47***            | 3.80***            |
| <b>Embarrassed</b>            | 2.08 (1.32)                                       | 82       | 2.06 (1.27)                                      | 72       | 2.56 (1.63)                                       | 79       | 0.08                                         | -2.04*             | -2.08*             |
| <b>Ashamed</b>                | 2.61 (1.52)                                       | 82       | 2.69 (1.40)                                      | 72       | 2.33 (1.34)                                       | 79       | -0.34                                        | 1.25               | 1.54               |
| Connectedness (multi-item)    | 3.95 (0.54)                                       | 82       | 3.87 (0.63)                                      | 72       | 3.80 (0.66)                                       | 79       | 1.28                                         |                    |                    |
| Happy                         | 5.67 (1.17)                                       | 82       | 5.06 (1.58)                                      | 72       | 4.29 (1.63)                                       | 79       | 19.20***                                     |                    |                    |
| Worried/anxious               | 2.79 (1.62)                                       | 82       | 2.94 (1.61)                                      | 72       | 4.30 (1.58)                                       | 79       | 21.28***                                     |                    |                    |
| Angry                         | 1.63 (1.09)                                       | 82       | 1.57 (0.92)                                      | 72       | 2.08 (1.31)                                       | 79       | 4.67**                                       |                    |                    |
| Frustrated                    | 1.83 (1.23)                                       | 82       | 1.85 (1.29)                                      | 72       | 2.73 (1.76)                                       | 79       | 8.12***                                      |                    |                    |
| Depressed/blue                | 2.15 (1.33)                                       | 82       | 2.08 (1.37)                                      | 72       | 2.99 (1.71)                                       | 79       | 7.77***                                      |                    |                    |
| Joyful                        | 4.32 (1.40)                                       | 82       | 4.07 (1.47)                                      | 72       | 3.87 (1.32)                                       | 79       | 2.04                                         |                    |                    |
| Unhappy                       | 1.95 (1.44)                                       | 82       | 1.72 (1.14)                                      | 72       | 2.43 (1.46)                                       | 79       | 5.60**                                       |                    |                    |
| Pleased                       | 4.72 (1.41)                                       | 82       | 4.31 (1.38)                                      | 72       | 3.96 (1.39)                                       | 79       | 5.97**                                       |                    |                    |
| Enjoyment/fun                 | 3.80 (1.54)                                       | 82       | 3.58 (1.50)                                      | 72       | 3.56 (1.38)                                       | 79       | 0.69                                         |                    |                    |
| Positive Emotion Composite    | 5.10 (0.87)                                       | 82       | 4.42 (1.23)                                      | 72       | 3.90 (1.17)                                       | 79       | 24.37***                                     |                    |                    |

|                                      |             |    |             |    |             |    |                   |        |      |
|--------------------------------------|-------------|----|-------------|----|-------------|----|-------------------|--------|------|
| Negative Emotion Composite           | 2.44 (0.97) | 82 | 2.14 (0.90) | 72 | 2.75 (1.12) | 79 | 7.06***           |        |      |
| Emodiversity: All emotions           | 2.36 (0.22) | 82 | 2.29 (0.33) | 72 | 2.39 (0.25) | 79 | 2.68 <sup>†</sup> |        |      |
| <b>Emodiversity: Social emotions</b> | 1.62 (0.22) | 82 | 1.52 (0.33) | 72 | 1.47 (0.38) | 79 | 2.32*             | 3.09** | 0.77 |

*Note:* A *t*-contrast is provided for emotions on which we performed a focused test (emboldened in the table). An omnibus *F*-statistic is reported for all other emotions.  
<sup>†</sup>*p* ≤ .10. \**p* ≤ .05. \*\**p* ≤ .01. \*\*\**p* ≤ .001.



Table L

*Bivariate Correlations Among Variables in Study 3: Both Cultures*

| Variable                      | 1    | 2    | 3    | 4    | 5    | 6    | 7    | 8    | 9    | 10   | 11   | 12   | 13   | 14   | 15   | 16   | 17  | 18 |
|-------------------------------|------|------|------|------|------|------|------|------|------|------|------|------|------|------|------|------|-----|----|
| 1. Grateful (single-item)     | --   |      |      |      |      |      |      |      |      |      |      |      |      |      |      |      |     |    |
| 2. Gratitude (multi-item)     | .35  | --   |      |      |      |      |      |      |      |      |      |      |      |      |      |      |     |    |
| 3. Indebted                   | .41  | -.02 | --   |      |      |      |      |      |      |      |      |      |      |      |      |      |     |    |
| 4. Guilty                     | .10  | -.14 | .37  | --   |      |      |      |      |      |      |      |      |      |      |      |      |     |    |
| 5. Moved                      | .69  | .22  | .38  | .08  | --   |      |      |      |      |      |      |      |      |      |      |      |     |    |
| 6. Uplifted                   | .60  | .21  | .27  | .02  | .75  | --   |      |      |      |      |      |      |      |      |      |      |     |    |
| 7. Embarrassed                | -.09 | -.26 | .13  | .28  | -.11 | -.15 | --   |      |      |      |      |      |      |      |      |      |     |    |
| 8. Ashamed                    | -.06 | -.11 | .18  | .19  | -.04 | -.09 | .58  | --   |      |      |      |      |      |      |      |      |     |    |
| 9. Connectedness (multi-item) | .21  | .50  | -.05 | -.11 | .19  | .18  | -.41 | -.39 | --   |      |      |      |      |      |      |      |     |    |
| 10. Happy                     | .68  | .40  | .20  | -.14 | .59  | .62  | -.22 | -.14 | .33  | --   |      |      |      |      |      |      |     |    |
| 11. Worried/anxious           | -.12 | -.21 | .14  | .34  | -.14 | -.09 | .30  | .19  | -.24 | -.23 | --   |      |      |      |      |      |     |    |
| 12. Angry                     | -.13 | -.31 | .09  | .27  | -.14 | -.10 | .42  | .27  | -.29 | -.23 | .36  | --   |      |      |      |      |     |    |
| 13. Frustrated                | -.19 | -.22 | .09  | .32  | -.19 | -.17 | .40  | .25  | -.27 | -.30 | .53  | .65  | --   |      |      |      |     |    |
| 14. Depressed/blue            | -.13 | -.32 | .20  | .33  | -.07 | -.09 | .45  | .28  | -.35 | -.33 | .49  | .59  | .62  | --   |      |      |     |    |
| 15. Joyful                    | .37  | .29  | .01  | -.12 | .37  | .44  | -.17 | -.15 | .38  | .55  | -.21 | -.13 | -.23 | -.28 | --   |      |     |    |
| 16. Unhappy                   | -.10 | -.30 | .14  | .28  | -.04 | -.09 | .39  | .29  | -.37 | -.32 | .46  | .59  | .60  | .74  | -.25 | --   |     |    |
| 17. Pleased                   | .41  | .36  | .01  | -.15 | .42  | .47  | -.20 | -.12 | .33  | .62  | -.25 | -.18 | -.28 | -.38 | .79  | -.32 | --  |    |
| 18. Enjoyment/fun             | .31  | .19  | .03  | -.05 | .29  | .35  | -.03 | -.01 | .26  | .46  | -.07 | .02  | -.10 | -.13 | .74  | -.12 | .63 | -- |

*Note:* Correlations are all based on at least 422 participants. Correlations .10 and above are significant at  $p \leq .05$ . Correlations .12 and above are significant at  $p \leq .01$ . Correlations .16 and above are significant at  $p \leq .001$ .

Table M

*Bivariate Correlations Among Variables in Study 3: U.S. Sample*

| Variable                      | 1    | 2    | 3     | 4    | 5    | 6     | 7    | 8    | 9    | 10   | 11   | 12   | 13   | 14   | 15   | 16   | 17  | 18 |  |
|-------------------------------|------|------|-------|------|------|-------|------|------|------|------|------|------|------|------|------|------|-----|----|--|
| 1. Grateful (single-item)     | --   |      |       |      |      |       |      |      |      |      |      |      |      |      |      |      |     |    |  |
| 2. Gratitude (multi-item)     | .28  | --   |       |      |      |       |      |      |      |      |      |      |      |      |      |      |     |    |  |
| 3. Indebted                   | .52  | -.05 | --    |      |      |       |      |      |      |      |      |      |      |      |      |      |     |    |  |
| 4. Guilty                     | .16  | -.12 | .38   | --   |      |       |      |      |      |      |      |      |      |      |      |      |     |    |  |
| 5. Moved                      | .69  | .14  | .53   | .22  | --   |       |      |      |      |      |      |      |      |      |      |      |     |    |  |
| 6. Uplifted                   | .61  | .09  | .44   | .14  | .81  | --    |      |      |      |      |      |      |      |      |      |      |     |    |  |
| 7. Embarrassed                | -.05 | -.29 | .03   | .20  | -.01 | -.01  | --   |      |      |      |      |      |      |      |      |      |     |    |  |
| 8. Ashamed                    | -.09 | -.20 | -.003 | .10  | -.03 | -.04  | .61  | --   |      |      |      |      |      |      |      |      |     |    |  |
| 9. Connectedness (multi-item) | .16  | .55  | -.002 | -.12 | .08  | .06   | -.39 | -.47 | --   |      |      |      |      |      |      |      |     |    |  |
| 10. Happy                     | .66  | .30  | .29   | -.10 | .55  | .61   | -.06 | -.14 | .32  | --   |      |      |      |      |      |      |     |    |  |
| 11. Worried/anxious           | -.01 | -.09 | .15   | .31  | -.01 | -.003 | .17  | .21  | -.23 | -.11 | --   |      |      |      |      |      |     |    |  |
| 12. Angry                     | -.03 | -.24 | .10   | .26  | .01  | .03   | .41  | .26  | -.31 | -.17 | .27  | --   |      |      |      |      |     |    |  |
| 13. Frustrated                | -.07 | -.09 | .02   | .23  | -.06 | -.01  | .24  | .13  | -.21 | -.13 | .44  | .68  | --   |      |      |      |     |    |  |
| 14. Depressed/blue            | .04  | -.25 | .21   | .38  | .17  | .13   | .39  | .36  | -.41 | -.21 | .35  | .60  | .54  | --   |      |      |     |    |  |
| 15. Joyful                    | .38  | .21  | .09   | -.09 | .35  | .42   | -.06 | -.18 | .37  | .54  | -.17 | -.06 | -.14 | -.23 | --   |      |     |    |  |
| 16. Unhappy                   | -.02 | -.20 | .13   | .35  | .05  | -.01  | .37  | .38  | -.40 | -.31 | .42  | .66  | .55  | .79  | -.25 | --   |     |    |  |
| 17. Pleased                   | .33  | .25  | .07   | -.10 | .34  | .39   | -.01 | -.12 | .31  | .57  | -.17 | -.14 | -.17 | -.27 | .78  | -.33 | --  |    |  |
| 18. Enjoyment/fun             | .28  | .11  | .08   | -.02 | .25  | .33   | .06  | -.07 | .28  | .48  | -.06 | .02  | .07  | -.12 | .76  | -.17 | .61 | -- |  |

*Note:* Correlations are all based on at least 189 participants. Correlations .14 and above are significant at  $p \leq .05$ . Correlations .18 and above are significant at  $p \leq .01$ . Correlations .23 and above are significant at  $p \leq .001$ .

Table N

*Bivariate Correlations Among Variables in Study 3: South Korean Sample*

| <b>Variable</b>               | <b>1</b> | <b>2</b> | <b>3</b> | <b>4</b> | <b>5</b> | <b>6</b> | <b>7</b> | <b>8</b> | <b>9</b> | <b>10</b> | <b>11</b> | <b>12</b> | <b>13</b> | <b>14</b> | <b>15</b> | <b>16</b> | <b>17</b> | <b>18</b> |
|-------------------------------|----------|----------|----------|----------|----------|----------|----------|----------|----------|-----------|-----------|-----------|-----------|-----------|-----------|-----------|-----------|-----------|
| 1. Grateful (single-item)     | --       |          |          |          |          |          |          |          |          |           |           |           |           |           |           |           |           |           |
| 2. Gratitude (multi-item)     | .41      | --       |          |          |          |          |          |          |          |           |           |           |           |           |           |           |           |           |
| 3. Indebted                   | .30      | -.05     | --       |          |          |          |          |          |          |           |           |           |           |           |           |           |           |           |
| 4. Guilty                     | .05      | -.15     | .38      | --       |          |          |          |          |          |           |           |           |           |           |           |           |           |           |
| 5. Moved                      | .71      | .33      | .25      | -.06     | --       |          |          |          |          |           |           |           |           |           |           |           |           |           |
| 6. Uplifted                   | .61      | .37      | .13      | -.11     | .68      | --       |          |          |          |           |           |           |           |           |           |           |           |           |
| 7. Embarrassed                | -.15     | .33      | .16      | .38      | -.19     | .26      | --       |          |          |           |           |           |           |           |           |           |           |           |
| 8. Ashamed                    | -.06     | -.17     | .27      | .32      | -.01     | -.06     | .50      | --       |          |           |           |           |           |           |           |           |           |           |
| 9. Connectedness (multi-item) | .27      | .57      | -.04     | -.13     | .28      | .27      | -.38     | -.23     | --       |           |           |           |           |           |           |           |           |           |
| 10. Happy                     | .70      | .50      | .11      | -.18     | .63      | .65      | -.36     | -.16     | .35      | --        |           |           |           |           |           |           |           |           |
| 11. Worried/anxious           | -.21     | -.30     | .15      | .36      | -.28     | -.19     | .43      | .21      | -.28     | -.34      | --        |           |           |           |           |           |           |           |
| 12. Angry                     | -.22     | -.35     | .11      | .28      | -.29     | -.25     | .48      | .37      | -.32     | -.29      | .44       | --        |           |           |           |           |           |           |
| 13. Frustrated                | -.32     | -.36     | .14      | .42      | -.31     | -.34     | .54      | .35      | -.31     | .46       | .63       | .64       | --        |           |           |           |           |           |
| 14. Depressed/blue            | -.29     | -.38     | .20      | .29      | -.32     | -.33     | .54      | .28      | -.33     | -.44      | .62       | .57       | .71       | --        |           |           |           |           |
| 15. Joyful                    | .37      | .43      | -.04     | -.16     | .39      | .44      | -.25     | -.04     | .36      | .56       | -.28      | -.22      | -.31      | -.36      | --        |           |           |           |
| 16. Unhappy                   | -.19     | -.41     | .15      | .23      | -.13     | -.18     | .43      | .23      | -.35     | -.33      | .50       | .54       | .65       | .69       | -.24      | --        |           |           |
| 17. Pleased                   | .50      | .48      | -.04     | -.20     | .50      | .57      | -.37     | -.10     | .36      | .68       | -.33      | -.23      | -.39      | -.49      | .80       | -.32      | --        |           |
| 18. Enjoyment/fun             | .35      | .32      | .01      | -.08     | .32      | .36      | -.09     | .12      | .21      | .45       | -.10      | .00       | -.12      | -.16      | .72       | -.05      | .66       | --        |

*Note:* Correlations are all based on at least 233 participants. Correlations .13 and above are significant at  $p \leq .05$ . Correlations .16 and above are significant at  $p \leq .01$ . Correlations .21 and above are significant at  $p \leq .001$ .

Table O

*Cluster Centroids for Study 3: Both Cultures*

| All Participants |                                 |                               |                                |                                |
|------------------|---------------------------------|-------------------------------|--------------------------------|--------------------------------|
| Item             | <i>M (SD)</i> across conditions | Cluster1<br>( <i>n</i> = 175) | Cluster 2<br>( <i>n</i> = 128) | Cluster 3<br>( <i>n</i> = 122) |
| Grateful         | 5.30 (1.63)                     | 6                             | 4                              | 6                              |
| Indebted         | 3.30 (2.00)                     | 3                             | 2                              | 5                              |
| Guilty           | 2.48 (1.73)                     | 2                             | 2                              | 4                              |
| Moved            | 4.38 (1.80)                     | 5                             | 2                              | 5                              |
| Uplifted         | 4.36 (1.71)                     | 5                             | 3                              | 5                              |
| Embarrassed      | 2.51 (1.47)                     | 1.93                          | 2.69                           | 3.15                           |
| Ashamed          | 3.03 (1.58)                     | 2.29                          | 3.12                           | 3.99                           |

*Note:* Centroids are the average of the scores for specific element of the cluster (e.g., Grateful or Moved) for that cluster (e.g., for Cluster 1).

Table P

*Table of Counts by Condition and Cluster Assignment for Study 3: Both Cultures*

| Cluster Assignment | Gratitude Condition | Kindness Condition | Control Condition | Total |
|--------------------|---------------------|--------------------|-------------------|-------|
| Cluster 1          | 74 (50.00%)         | 72 (52.94%)        | 29 (20.57%)       | 175   |
| Cluster 2          | 8 (5.41%)           | 32 (23.53%)        | 88 (62.41%)       | 128   |
| Cluster 3          | 66 (44.59%)         | 32 (23.53%)        | 24 (17.02%)       | 122   |
| Total              | 148                 | 136                | 141               | 425   |

*Note:* Percentages represent proportion of each condition in each cluster. Participants per condition are lower than in other analyses because two participants were listwise deleted for failing to answer at least one of the seven variables.

Table Q

*Cluster Centroids for Study 3: U.S. Sample*

| All Participants |                                          |                               |                               |
|------------------|------------------------------------------|-------------------------------|-------------------------------|
| Item             | <i>M</i> ( <i>SD</i> ) across conditions | Cluster1<br>( <i>n</i> = 118) | Cluster 2<br>( <i>n</i> = 74) |
| Grateful         | 5.37 (1.72)                              | 6                             | 4                             |
| Indebted         | 3.62 (2.08)                              | 5                             | 2                             |
| Guilty           | 2.38 (1.70)                              | 3                             | 2                             |
| Moved            | 4.25 (1.92)                              | 5                             | 2                             |
| Uplifted         | 4.13 (1.85)                              | 5                             | 3                             |
| Embarrassed      | 2.84 (1.44)                              | 2.73                          | 2.84                          |
| Ashamed          | 3.63 (1.55)                              | 3.54                          | 3.76                          |

*Note:* Centroids are the average of the scores for specific element of the cluster (e.g., Grateful or Moved) for that cluster (e.g., for Cluster 1).

Table R

*Table of Counts by Condition and Cluster Assignment for Study 3: U.S. Sample*

| Cluster Assignment | Gratitude Condition | Kindness Condition | Control Condition | Total |
|--------------------|---------------------|--------------------|-------------------|-------|
| Cluster 1          | 61 (92.42%)         | 46 (71.88%)        | 11 (17.74%)       | 118   |
| Cluster 2          | 5 (7.58%)           | 18 (28.13%)        | 51 (82.26%)       | 74    |
| Total              | 66                  | 64                 | 62                | 192   |

*Note:* Percentages represent proportion of each condition in each cluster. Participants per condition are lower than in other analyses because two participants were listwise deleted for failing to answer at least one of the seven variables. Participants from the three conditions were not evenly distributed across clusters,  $\chi^2(2) = 79.67, p < .001$ .

Table S

*Cluster Centroids for Study 3: South Korean Sample*

| All Participants |                                 |                                |                               |                                |
|------------------|---------------------------------|--------------------------------|-------------------------------|--------------------------------|
| Item             | <i>M (SD)</i> across conditions | Cluster 1<br>( <i>n</i> = 116) | Cluster 2<br>( <i>n</i> = 68) | Cluster 3<br>( <i>n</i> = 122) |
| Grateful         | 5.24 (1.56)                     | 6                              | 4                             | 5                              |
| Indebted         | 3.03 (1.90)                     | 3                              | 2                             | 5                              |
| Guilty           | 2.55 (1.75)                     | 2                              | 2                             | 5                              |
| Moved            | 4.48 (1.69)                     | 6                              | 3                             | 4                              |
| Uplifted         | 4.55 (1.56)                     | 6                              | 3                             | 4                              |
| Embarrassed      | 2.24 (1.43)                     | 1.70                           | 2.21                          | 3.54                           |
| Ashamed          | 2.54 (1.43)                     | 2.09                           | 2.28                          | 3.97                           |

*Note:* Centroids are the average of the scores for specific element of the cluster (e.g., Grateful or Moved) for that cluster (e.g., for Cluster 1).

Table T

*Table of Counts by Condition and Cluster Assignment for Study 3: South Korean Sample*

| Cluster Assignment | Gratitude Condition | Kindness Condition | Control Condition | Total |
|--------------------|---------------------|--------------------|-------------------|-------|
| Cluster 1          | 57 (69.51%)         | 39 (54.17%)        | 20 (25.32%)       | 116   |
| Cluster 2          | 5 (6.10%)           | 25 (34.72%)        | 38 (48.10%)       | 68    |
| Cluster 3          | 20 (24.39%)         | 8 (11.11%)         | 21 (26.58%)       | 49    |
| Total              | 82                  | 72                 | 79                | 233   |

*Note:* Percentages represent proportion of each condition in each cluster. Participants per condition are lower than in other analyses because two participants were listwise deleted for failing to answer at least one of the seven variables. Participants from the three conditions were not evenly distributed across clusters,  $\chi^2(4) = 46.57, p < .001$ .

Table U

*Effects of Sex, Culture, and Condition on Dependent Variables in Study 3*

| Source                        | df  | F      | p     | Condition  | M(SE)       |             |             |             |
|-------------------------------|-----|--------|-------|------------|-------------|-------------|-------------|-------------|
|                               |     |        |       |            | Men/U.S.    | Women/U.S.  | Men/S.K.    | Women/S.K.  |
| <b>Grateful (single-item)</b> |     |        |       |            |             |             |             |             |
| Condition                     | 2   | 73.98  | <.001 | Gratitude: | 6.17 (0.29) | 6.62 (0.21) | 6.21 (0.24) | 6.35 (0.20) |
| Sex                           | 1   | 6.14   | .01   | Kindness:  | 5.24 (0.34) | 5.64 (0.20) | 4.51 (0.23) | 5.06 (0.23) |
| Culture                       | 1   | 0.18   | .68   | Control:   | 3.83 (0.33) | 4.11 (0.20) | 4.41 (0.23) | 4.71 (0.21) |
| Condition X Sex               | 2   | 0.17   | .85   |            |             |             |             |             |
| Condition X Culture           | 2   | 6.16   | .002  |            |             |             |             |             |
| Sex X Culture                 | 1   | 0.02   | .89   |            |             |             |             |             |
| Condition X Sex X Culture     | 2   | 0.22   | .80   |            |             |             |             |             |
| Culture Error                 | 416 |        |       |            |             |             |             |             |
| <b>Grateful (multi-item)</b>  |     |        |       |            |             |             |             |             |
| Condition                     | 2   | 1.05   | .35   | Gratitude: | 5.41 (0.21) | 5.86 (0.16) | 5.43 (0.17) | 5.49 (0.15) |
| Sex                           | 1   | 2.81   | .09   | Kindness:  | 5.43 (0.24) | 6.00 (0.15) | 5.57 (0.17) | 5.16 (0.17) |
| Culture                       | 1   | 9.90   | .002  | Control:   | 5.52 (0.24) | 5.70 (0.15) | 5.08 (0.16) | 5.25 (0.16) |
| Condition X Sex               | 2   | 0.24   | .78   |            |             |             |             |             |
| Condition X Culture           | 2   | 0.64   | .53   |            |             |             |             |             |
| Sex X Culture                 | 1   | 4.95   | .03   |            |             |             |             |             |
| Condition X Sex X Culture     | 2   | 1.79   | .17   |            |             |             |             |             |
| Culture Error                 | 417 |        |       |            |             |             |             |             |
| <b>Indebted</b>               |     |        |       |            |             |             |             |             |
| Condition                     | 2   | 59.78  | <.001 | Gratitude: | 4.74 (0.36) | 5.24 (0.27) | 4.03 (0.30) | 4.42 (0.25) |
| Sex                           | 1   | 0.59   | .44   | Kindness:  | 3.77 (0.42) | 3.17 (0.25) | 2.11 (0.28) | 2.50 (0.29) |
| Culture                       | 1   | 12.33  | <.001 | Control:   | 2.28 (0.41) | 2.44 (0.25) | 2.43 (0.28) | 2.41 (0.27) |
| Condition X Sex               | 2   | 0.84   | .43   |            |             |             |             |             |
| Condition X Culture           | 2   | 4.03   | .02   |            |             |             |             |             |
| Sex X Culture                 | 1   | 0.42   | .52   |            |             |             |             |             |
| Condition X Sex X Culture     | 2   | 1.11   | .33   |            |             |             |             |             |
| Culture Error                 | 417 |        |       |            |             |             |             |             |
| <b>Guilty</b>                 |     |        |       |            |             |             |             |             |
| Condition                     | 2   | 1.85   | .16   | Gratitude: | 2.35 (0.36) | 2.69 (0.27) | 2.62 (0.29) | 2.67 (0.25) |
| Sex                           | 1   | 0.02   | .89   | Kindness:  | 2.71 (0.42) | 2.19 (0.25) | 1.81 (0.28) | 2.22 (0.29) |
| Culture                       | 1   | 0.43   | .51   | Control:   | 2.44 (0.40) | 2.13 (0.25) | 3.00 (0.28) | 2.88 (0.27) |
| Condition X Sex               | 2   | 0.48   | .62   |            |             |             |             |             |
| Condition X Culture           | 2   | 3.06   | .05   |            |             |             |             |             |
| Sex X Culture                 | 1   | 0.62   | .43   |            |             |             |             |             |
| Condition X Sex X Culture     | 2   | 1.01   | .37   |            |             |             |             |             |
| Culture Error                 | 416 |        |       |            |             |             |             |             |
| <b>Moved</b>                  |     |        |       |            |             |             |             |             |
| Condition                     | 2   | 110.51 | <.001 | Gratitude: | 4.96 (0.29) | 5.79 (0.22) | 5.56 (0.24) | 5.71 (0.20) |
| Sex                           | 1   | 8.52   | .004  | Kindness:  | 3.94 (0.34) | 4.92 (0.21) | 4.51 (0.23) | 4.47 (0.24) |
| Culture                       | 1   | 5.39   | .02   | Control:   | 2.56 (0.33) | 2.60 (0.20) | 2.97 (0.23) | 3.55 (0.22) |
| Condition X Sex               | 2   | 0.15   | .86   |            |             |             |             |             |
| Condition X Culture           | 2   | 1.53   | .22   |            |             |             |             |             |
| Sex X Culture                 | 1   | 1.81   | .18   |            |             |             |             |             |
| Condition X Sex X Culture     | 2   | 2.57   | .08   |            |             |             |             |             |
| Culture Error                 | 417 |        |       |            |             |             |             |             |

Table U continued

| Source                            | df  | F     | p     | Condition  | M(SE)       |             |             |             |
|-----------------------------------|-----|-------|-------|------------|-------------|-------------|-------------|-------------|
|                                   |     |       |       |            | Men/U.S.    | Women/U.S.  | Men/S.K.    | Women/S.K.  |
| <b>Uplifted</b>                   |     |       |       |            |             |             |             |             |
| Condition                         | 2   | 51.10 | <.001 | Gratitude: | 4.65 (0.31) | 5.29 (0.23) | 4.97 (0.26) | 5.42 (0.22) |
| Sex                               | 1   | 5.21  | .02   | Kindness:  | 4.06 (0.36) | 4.70 (0.22) | 4.84 (0.25) | 4.47 (0.25) |
| Culture                           | 1   | 10.24 | .001  | Control:   | 2.78 (0.35) | 2.75 (0.22) | 3.35 (0.25) | 4.12 (0.23) |
| Condition X Sex                   | 2   | 0.57  | .56   |            |             |             |             |             |
| Condition X Culture               | 2   | 2.48  | .09   |            |             |             |             |             |
| Sex X Culture                     | 1   | 0.19  | .66   |            |             |             |             |             |
| Condition X Sex X Culture         | 2   | 2.80  | .06   |            |             |             |             |             |
| Error                             | 417 |       |       |            |             |             |             |             |
| <b>Embarrassed</b>                |     |       |       |            |             |             |             |             |
| Condition                         | 2   | 3.84  | .02   | Gratitude: | 2.70 (0.30) | 2.75 (0.22) | 2.02 (0.25) | 2.13 (0.21) |
| Sex                               | 1   | 0.15  | .70   | Kindness:  | 2.77 (0.35) | 2.79 (0.21) | 1.81 (0.24) | 2.33 (0.24) |
| Culture                           | 1   | 18.8  | <.001 | Control:   | 3.25 (0.34) | 3.00 (0.21) | 2.62 (0.24) | 2.50 (0.22) |
| Condition X Sex                   | 2   | 0.79  | .46   |            |             |             |             |             |
| Condition X Culture               | 2   | 0.07  | .93   |            |             |             |             |             |
| Sex X Culture                     | 1   | 0.60  | .44   |            |             |             |             |             |
| Condition X Sex X Culture         | 2   | 0.21  | .81   |            |             |             |             |             |
| Error                             | 417 |       |       |            |             |             |             |             |
| <b>Ashamed</b>                    |     |       |       |            |             |             |             |             |
| Condition                         | 2   | 1.31  | .27   | Gratitude: | 2.83 (0.31) | 3.57 (0.23) | 2.37 (0.25) | 2.78 (0.21) |
| Sex                               | 1   | 5.08  | .03   | Kindness:  | 3.38 (0.36) | 3.94 (0.21) | 2.66 (0.24) | 2.75 (0.25) |
| Culture                           | 1   | 40.77 | <.001 | Control:   | 3.33 (0.35) | 3.97 (0.21) | 2.54 (0.24) | 2.14 (0.23) |
| Condition X Sex                   | 2   | 0.81  | .45   |            |             |             |             |             |
| Condition X Culture               | 2   | 1.78  | .17   |            |             |             |             |             |
| Sex X Culture                     | 1   | 4.10  | .04   |            |             |             |             |             |
| Condition X Sex X Culture         | 2   | 0.52  | .60   |            |             |             |             |             |
| Error                             | 417 |       |       |            |             |             |             |             |
| <b>Connectedness (multi-item)</b> |     |       |       |            |             |             |             |             |
| Condition                         | 2   | 1.74  | .18   | Gratitude: | 3.74 (0.13) | 3.74 (0.10) | 3.97 (0.11) | 3.93 (0.09) |
| Sex                               | 1   | 1.33  | .25   | Kindness:  | 3.60 (0.16) | 3.56 (0.09) | 3.91 (0.11) | 3.81 (0.11) |
| Culture                           | 1   | 11.19 | .001  | Control:   | 3.74 (0.15) | 3.52 (0.09) | 3.82 (0.11) | 3.77 (0.10) |
| Condition X Sex                   | 2   | 0.28  | .76   |            |             |             |             |             |
| Condition X Culture               | 2   | 0.25  | .78   |            |             |             |             |             |
| Sex X Culture                     | 1   | 0.02  | .89   |            |             |             |             |             |
| Condition X Sex X Culture         | 2   | 0.31  | .74   |            |             |             |             |             |
| Error                             | 417 |       |       |            |             |             |             |             |
| <b>Happy</b>                      |     |       |       |            |             |             |             |             |
| Condition                         | 2   | 34.44 | <.001 | Gratitude: | 5.74 (0.31) | 5.93 (0.23) | 5.62 (0.26) | 5.71 (0.22) |
| Sex                               | 1   | 0.82  | .37   | Kindness:  | 4.94 (0.36) | 5.20 (0.22) | 5.08 (0.25) | 5.03 (0.25) |
| Culture                           | 1   | 0.01  | .92   | Control:   | 4.24 (0.36) | 4.04 (0.22) | 4.00 (0.25) | 4.55 (0.23) |
| Condition X Sex                   | 2   | 0.02  | .98   |            |             |             |             |             |
| Condition X Culture               | 2   | 0.34  | .71   |            |             |             |             |             |
| Sex X Culture                     | 1   | 0.13  | .72   |            |             |             |             |             |
| Condition X Sex X Culture         | 2   | 1.06  | .35   |            |             |             |             |             |
| Error                             | 413 |       |       |            |             |             |             |             |



Table U continued

| Source                    | df  | F     | p     | Condition  | M(SE)       |             |             |             |
|---------------------------|-----|-------|-------|------------|-------------|-------------|-------------|-------------|
|                           |     |       |       |            | Men/U.S.    | Women/U.S.  | Men/S.K.    | Women/S.K.  |
| <b>Worried/anxious</b>    |     |       |       |            |             |             |             |             |
| Condition                 | 2   | 17.85 | <.001 | Gratitude: | 2.61 (0.35) | 3.33 (0.26) | 2.35 (0.29) | 3.10 (0.24) |
| Sex                       | 1   | 0.66  | .42   | Kindness:  | 3.29 (0.41) | 2.72 (0.25) | 2.95 (0.28) | 3.00 (0.28) |
| Culture                   | 1   | 0.41  | .52   | Control:   | 3.61 (0.40) | 2.79 (0.24) | 4.46 (0.28) | 4.17 (0.26) |
| Condition X Sex           | 2   | 3.17  | .04   |            |             |             |             |             |
| Condition X Culture       | 2   | 2.24  | .11   |            |             |             |             |             |
| Sex X Culture             | 1   | 0.03  | .86   |            |             |             |             |             |
| Condition X Sex X Culture | 2   | 0.81  | .45   |            |             |             |             |             |
| Error                     | 417 |       |       |            |             |             |             |             |
| <b>Angry</b>              |     |       |       |            |             |             |             |             |
| Condition                 | 2   | 3.89  | .02   | Gratitude: | 1.70 (0.24) | 1.55 (0.17) | 1.68 (0.19) | 1.60 (0.17) |
| Sex                       | 1   | 0.33  | .57   | Kindness:  | 1.53 (0.27) | 1.40 (0.17) | 1.43 (0.19) | 1.72 (0.19) |
| Culture                   | 1   | 1.99  | .16   | Control:   | 1.67 (0.27) | 1.79 (0.16) | 2.32 (0.19) | 1.86 (0.17) |
| Condition X Sex           | 2   | 0.42  | .66   |            |             |             |             |             |
| Condition X Culture       | 2   | 0.80  | .45   |            |             |             |             |             |
| Sex X Culture             | 1   | 0.02  | .88   |            |             |             |             |             |
| Condition X Sex X Culture | 2   | 1.59  | .21   |            |             |             |             |             |
| Error                     | 417 |       |       |            |             |             |             |             |
| <b>Frustrated</b>         |     |       |       |            |             |             |             |             |
| Condition                 | 2   | 9.19  | <.001 | Gratitude: | 1.78 (0.32) | 2.48 (0.24) | 1.79 (0.27) | 1.85 (0.22) |
| Sex                       | 1   | 0.52  | .47   | Kindness:  | 2.24 (0.38) | 2.00 (0.23) | 1.81 (0.25) | 1.97 (0.26) |
| Culture                   | 1   | 0.95  | .33   | Control:   | 2.50 (0.36) | 2.85 (0.22) | 2.92 (0.25) | 2.57 (0.24) |
| Condition X Sex           | 2   | 0.71  | .49   |            |             |             |             |             |
| Condition X Culture       | 2   | 0.52  | .60   |            |             |             |             |             |
| Sex X Culture             | 1   | 0.97  | .33   |            |             |             |             |             |
| Condition X Sex X Culture | 2   | 1.21  | .30   |            |             |             |             |             |
| Error                     | 417 |       |       |            |             |             |             |             |
| <b>Depressed/blue</b>     |     |       |       |            |             |             |             |             |
| Condition                 | 2   | 2.77  | .06   | Gratitude: | 2.13 (0.33) | 2.45 (0.24) | 2.12 (0.27) | 2.17 (0.23) |
| Sex                       | 1   | 0.36  | .55   | Kindness:  | 2.24 (0.38) | 2.23 (0.23) | 1.95 (0.26) | 2.31 (0.26) |
| Culture                   | 1   | 1.25  | .27   | Control:   | 2.11 (0.37) | 2.29 (0.23) | 3.16 (0.26) | 2.83 (0.24) |
| Condition X Sex           | 2   | 0.28  | .75   |            |             |             |             |             |
| Condition X Culture       | 2   | 3.70  | .03   |            |             |             |             |             |
| Sex X Culture             | 1   | 0.19  | .66   |            |             |             |             |             |
| Condition X Sex X Culture | 2   | 0.63  | .53   |            |             |             |             |             |
| Error                     | 417 |       |       |            |             |             |             |             |
| <b>Joyful</b>             |     |       |       |            |             |             |             |             |
| Condition                 | 2   | 5.49  | .004  | Gratitude: | 4.26 (0.32) | 3.86 (0.23) | 4.47 (0.26) | 4.21 (0.22) |
| Sex                       | 1   | 3.64  | .06   | Kindness:  | 3.94 (0.37) | 4.09 (0.22) | 4.32 (0.25) | 3.81 (0.25) |
| Culture                   | 1   | 3.53  | .06   | Control:   | 3.78 (0.36) | 2.88 (0.22) | 3.78 (0.25) | 3.95 (0.23) |
| Condition X Sex           | 2   | 0.12  | .89   |            |             |             |             |             |
| Condition X Culture       | 2   | 0.81  | .45   |            |             |             |             |             |
| Sex X Culture             | 1   | 0.35  | .56   |            |             |             |             |             |
| Condition X Sex X Culture | 2   | 2.53  | .08   |            |             |             |             |             |
| Error                     | 417 |       |       |            |             |             |             |             |

Table U continued

| Source                     | <i>df</i> | <i>F</i> | <i>p</i> | Condition  | <i>M(SE)</i>    |                   |                 |                   |
|----------------------------|-----------|----------|----------|------------|-----------------|-------------------|-----------------|-------------------|
|                            |           |          |          |            | <u>Men/U.S.</u> | <u>Women/U.S.</u> | <u>Men/S.K.</u> | <u>Women/S.K.</u> |
| Unhappy                    |           |          |          |            |                 |                   |                 |                   |
| Condition                  | 2         | 2.50     | .08      | Gratitude: | 1.61 (0.30)     | 2.05 (0.22)       | 2.06 (0.25)     | 1.88 (0.21)       |
| Sex                        | 1         | 0.08     | .78      | Kindness:  | 2.53 (0.35)     | 2.09 (0.21)       | 1.76 (0.24)     | 1.78 (0.24)       |
| Culture                    | 1         | 0.06     | .81      | Control:   | 2.06 (0.34)     | 2.23 (0.21)       | 2.57 (0.24)     | 2.31 (0.22)       |
| Condition X Sex            | 2         | 0.44     | .64      |            |                 |                   |                 |                   |
| Condition X Culture        | 2         | 2.92     | .06      |            |                 |                   |                 |                   |
| Sex X Culture              | 1         | 0.44     | .51      |            |                 |                   |                 |                   |
| Condition X Sex X Culture  | 2         | 1.27     | .28      |            |                 |                   |                 |                   |
| Error                      | 417       |          |          |            |                 |                   |                 |                   |
| Pleased                    |           |          |          |            |                 |                   |                 |                   |
| Condition                  | 2         | 8.57     | <.001    | Gratitude: | 4.64 (0.31)     | 4.38 (0.23)       | 4.91 (0.25)     | 4.58 (0.21)       |
| Sex                        | 1         | 0.58     | .45      | Kindness:  | 4.18 (0.35)     | 4.55 (0.21)       | 4.38 (0.24)     | 4.22 (0.24)       |
| Culture                    | 1         | 0.48     | .49      | Control:   | 4.17 (0.34)     | 3.46 (0.21)       | 3.76 (0.24)     | 4.14 (0.23)       |
| Condition X Sex            | 2         | 0.61     | .54      |            |                 |                   |                 |                   |
| Condition X Culture        | 2         | 0.35     | .71      |            |                 |                   |                 |                   |
| Sex X Culture              | 1         | 0.29     | .59      |            |                 |                   |                 |                   |
| Condition X Sex X Culture  | 2         | 2.55     | .08      |            |                 |                   |                 |                   |
| Error                      | 416       |          |          |            |                 |                   |                 |                   |
| Enjoyment/fun              |           |          |          |            |                 |                   |                 |                   |
| Condition                  | 2         | 1.79     | .17      | Gratitude: | 3.57 (0.33)     | 3.62 (0.25)       | 4.21 (0.27)     | 3.52 (0.23)       |
| Sex                        | 1         | 1.61     | .21      | Kindness:  | 3.29 (0.38)     | 3.49 (0.23)       | 3.76 (0.26)     | 3.42 (0.26)       |
| Culture                    | 1         | 2.96     | .09      | Control:   | 3.50 (0.37)     | 3.85 (0.23)       | 3.46 (0.26)     | 3.64 (0.25)       |
| Condition X Sex            | 2         | 0.19     | .83      |            |                 |                   |                 |                   |
| Condition X Culture        | 2         | 0.10     | .91      |            |                 |                   |                 |                   |
| Sex X Culture              | 1         | 0.21     | .65      |            |                 |                   |                 |                   |
| Condition X Sex X Culture  | 2         | 2.31     | .10      |            |                 |                   |                 |                   |
| Error                      | 417       |          |          |            |                 |                   |                 |                   |
| Positive Emotion Composite |           |          |          |            |                 |                   |                 |                   |
| Condition                  | 2         | 51.48    | <.001    | Gratitude: | 4.86 (0.23)     | 5.06 (0.17)       | 5.13 (0.19)     | 5.06 (0.16)       |
| Sex                        | 1         | 0.60     | .44      | Kindness:  | 4.23 (0.27)     | 4.66 (0.16)       | 4.49 (0.18)     | 4.35 (0.19)       |
| Culture                    | 1         | 3.24     | .07      | Control:   | 3.55 (0.26)     | 3.23 (0.16)       | 3.68 (0.18)     | 4.10 (0.17)       |
| Condition X Sex            | 2         | 0.07     | .94      |            |                 |                   |                 |                   |
| Condition X Culture        | 2         | 1.73     | .18      |            |                 |                   |                 |                   |
| Sex X Culture              | 1         | 0.02     | .90      |            |                 |                   |                 |                   |
| Condition X Sex X Culture  | 2         | 2.92     | .06      |            |                 |                   |                 |                   |
| Error                      | 417       |          |          |            |                 |                   |                 |                   |
| Negative Emotion Composite |           |          |          |            |                 |                   |                 |                   |
| Condition                  | 2         | 3.17     | .04      | Gratitude: | 2.49 (0.21)     | 2.90 (0.15)       | 2.34 (0.17)     | 2.51 (0.14)       |
| Sex                        | 1         | 0.66     | .42      | Kindness:  | 2.72 (0.24)     | 2.50 (0.15)       | 2.03 (0.16)     | 2.29 (0.17)       |
| Culture                    | 1         | 3.99     | .05      | Control:   | 2.58 (0.24)     | 2.72 (0.14)       | 2.89 (0.16)     | 2.63 (0.15)       |
| Condition X Sex            | 2         | 1.12     | .33      |            |                 |                   |                 |                   |
| Condition X Culture        | 2         | 2.51     | .08      |            |                 |                   |                 |                   |
| Sex X Culture              | 1         | 0.07     | .79      |            |                 |                   |                 |                   |
| Condition X Sex X Culture  | 2         | 1.62     | .20      |            |                 |                   |                 |                   |
| Error                      | 417       |          |          |            |                 |                   |                 |                   |

Table U continued

| Source                        | df  | F     | p     | Condition  | M(SE)       |             |             |             |
|-------------------------------|-----|-------|-------|------------|-------------|-------------|-------------|-------------|
|                               |     |       |       |            | Men/U.S.    | Women/U.S.  | Men/S.K.    | Women/S.K.  |
| Emodiversity: All emotions    |     |       |       |            |             |             |             |             |
| Condition                     | 2   | 0.24  | .79   | Gratitude: | 2.31 (0.06) | 2.38 (0.04) | 2.38 (0.05) | 2.34 (0.04) |
| Sex                           | 1   | 0.11  | .74   | Kindness:  | 2.40 (0.07) | 2.33 (0.04) | 2.27 (0.05) | 2.32 (0.05) |
| Culture                       | 1   | 0.28  | .59   | Control:   | 2.34 (0.07) | 2.22 (0.04) | 2.36 (0.05) | 2.22 (0.04) |
| Condition X Sex               | 2   | 0.26  | .77   |            |             |             |             |             |
| Condition X Culture           | 2   | 2.83  | .06   |            |             |             |             |             |
| Sex X Culture                 | 1   | 1.20  | .27   |            |             |             |             |             |
| Condition X Sex X Culture     | 2   | 2.12  | .12   |            |             |             |             |             |
| Error                         | 411 |       |       |            |             |             |             |             |
| Emodiversity: Social emotions |     |       |       |            |             |             |             |             |
| Condition                     | 2   | 11.96 | <.001 | Gratitude: | 1.65 (0.07) | 1.70 (0.05) | 1.62 (0.06) | 1.62 (0.05) |
| Sex                           | 1   | 0.75  | .39   | Kindness:  | 1.64 (0.08) | 1.65 (0.05) | 1.46 (0.05) | 1.58 (0.05) |
| Culture                       | 1   | 2.11  | .15   | Control:   | 1.48 (0.08) | 1.39 (0.05) | 1.43 (0.05) | 1.51 (0.05) |
| Condition X Sex               | 2   | 0.31  | .73   |            |             |             |             |             |
| Condition X Culture           | 2   | 1.83  | .16   |            |             |             |             |             |
| Sex X Culture                 | 1   | 1.14  | .29   |            |             |             |             |             |
| Condition X Sex X Culture     | 2   | 1.00  | .37   |            |             |             |             |             |
| Error                         | 415 |       |       |            |             |             |             |             |

*Note:* The Factorial ANOVA results of the condition by culture interaction reported in the main manuscript are from analyses run on just condition and culture effects, without sex in the model. The results presented in Table 25 should be taken with caution as our U.S. sample was 70.5% female (S.K. sample was 54.08% female), and therefore we had fewer male participants from which to draw inferences. No consistent patterns emerged except for a main effect of condition on most of our hypothesized variables (consistent with the results reported in the manuscript).
